# Supplementary material
Source: MDPI journal article supplement (https://www.mdpi.com/2071-1050/13/4/2125)
Supplement: s1 [file s1]

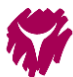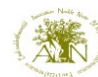

# ACTES DE L'ATELIER DE VALIDATION DES CRITERES DE SELECTION DU ZEBU PEUL

*- Juillet 2006 -*

## **Rapporteurs :**

**Dr Lucca FABOZZI** / Chef de projet

**Rigobert T. BOGNANA** / Chargé de l'amélioration génétique et de l'alimentation

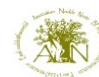

---

## **SIGLES ET ABREVIATIONS**

|                |                                                                                  |
|----------------|----------------------------------------------------------------------------------|
| <b>A2N</b>     | : Association Nodde Noto                                                         |
| <b>CIRDES</b>  | : Centre International de Recherche-Développement de l'Elevage en zone Subhumide |
| <b>CL</b>      | : Comité Local                                                                   |
| <b>CNEAG</b>   | : Centre National d'Elevage et d'Amélioration Génétique                          |
| <b>CP</b>      | : Comité de Pilotage                                                             |
| <b>CSLP</b>    | : Cadre Stratégique de Lutte Contre la Pauvreté                                  |
| <b>DIPPA</b>   | : Direction de l'Intensification et de la Promotion des Productions Animales     |
| <b>DPRA</b>    | : Direction Provinciale des Ressources Animales                                  |
| <b>DRRA</b>    | : Direction Régionale des Ressources Animales                                    |
| <b>EE</b>      | : Eleveurs Encadrés                                                              |
| <b>ES</b>      | : Eleveurs Sélectionneurs                                                        |
| <b>ETV</b>     | : Eleveurs Tout Venant                                                           |
| <b>FAO</b>     | : Organisme International d'Agriculture et de lutte contre la Famine             |
| <b>GMQ</b>     | : Gain Moyen Quotidien                                                           |
| <b>INERA</b>   | : Institut de l'Environnement de Recherches Agricoles                            |
| <b>MRA</b>     | : Ministère des Ressources Animales                                              |
| <b>ONG</b>     | : Organisme Non Gouvernemental                                                   |
| <b>OPE</b>     | : Organisation Professionnelle d'Eleveurs                                        |
| <b>PAPISE</b>  | : Plan d'Actions et Programme d'Investissement du Secteur d'Elevage              |
| <b>PDL/UDL</b> | : Programme de Développement Local de l'Oudalan                                  |
| <b>PSDZA</b>   | : Projet de Soutien à la Diffusion du Zébu Azawak                                |
| <b>UT</b>      | : Unité de Testage                                                               |
| <b>VSF/B</b>   | : Vétérinaires Sans Frontières - Belgique                                        |



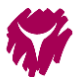

## **SOMMAIRE**

### **INTRODUCTION**

### **DISCOURS D'OUVERTURE**

#### **I. COMPTE RENDU DE L'ATELIER**

#### **II. SYNTHESE DES COMMUNICATIONS ET DES DISCUSSIONS**

##### **STRATEGIE D'AMELIORATION GENETIQUE DU PROJET**

##### **ETAT D'AVANCEMENT DES ACTIVITES**

#### **III. CADRES DE CONCERTATION EN AMELIORATION GENETIQUE**

#### **IV. RECOMMADATIONS DE L'ATELIER**

### **CONCLUSION**

### **ANNEXES**



---

## INTRODUCTION

Il s'est tenu le 5 Mai 2006 à Gorom-Gorom un important atelier de validation des critères de sélection du zébu peul sur l'initiative du projet d'appui au développement du Zébu Peul au Sahel (ZEPESA). Le présent document est un portrait de l'ensemble des travaux qui se sont déroulés au cours de cet atelier.

Le projet ZEPESA s'inscrit dans le cadre stratégie stratégique de lutte contre la pauvreté (CSLP) à travers son objectif global « **contribuer à améliorer les revenus et de la sécurité alimentaire des pasteurs et agropasteurs de la région du Sahel** ». Pour sa contribution dans la diminution de la pauvreté au niveau de la région du Sahel, le projet ZEPESA met l'accent sur la promotion du zébu peul, la race locale de bovin la plus dominante au Burkina Faso. Cette race a été longtemps négligée malgré un certain nombre de valeurs intrinsèques qui lui sont reconnues. L'idée de promouvoir le zébu peul est née d'une collaboration entre l'ONG internationale Vétérinaires Sans Frontières - Belgique (VSF/B) et le Ministère des Ressources Animales (MRA) qui ont développé la stratégie globale d'actions et l'approche à mener dans la perspective d'une promotion durable des éleveurs et de leurs familles.

A travers la publication de ce document, le projet ZEPESA vise le renforcement de la collaboration avec les partenaires dans la mise en œuvre de sa stratégie d'amélioration génétique. Les principaux sujets qui ont animé l'atelier sont proposés dans ce document.



---

## **DISCOURS D'OUVERTURE**

**Monsieur le Directeur régional des ressources animales,  
Monsieur le premier adjoint du Maire de la commune de Gorom-Gorom, représentant le Maire,  
Monsieur le Directeur provincial des ressources animales,  
Messieurs les Directeurs des services centraux de l'Etat,  
Messieurs les chefs de projets et ONG partenaires,  
Chers participants.**

Le projet d'appui au développement du Zébu Peul au Sahel (ZEPESA) est un projet conduit par deux Organisations Non Gouvernementales (ONG) à savoir : Vétérinaires Sans Frontières – Belgique et l'Association Nodde Nooto (A2N). Il vise l'amélioration des revenus et de la sécurité alimentaire des pasteurs et agropasteurs de la zone sahélienne par une augmentation des productions animales.

Le projet est prévu pour une durée de 13 ans dans la région du Sahel dont une première phase test de 4 ans dans la province de l'Oudalan. A travers son objectif spécifique, le projet veut atteindre une augmentation des productions de bovin de race zébu peul.

Notre province a l'honneur et la responsabilité d'accueillir les tous premiers efforts de chercheurs, éleveurs et services d'Etat, tous convergeant vers une valorisation Du zébu peul, la race locale longtemps négligée mais qui représente au moins 90% du cheptel bovin de la région du Sahel avec des valeurs intrinsèques reconnues.

Cet atelier est une première au Burkina Faso et probablement dans la sous région. Les critères traditionnellement appliqués par les éleveurs, ainsi que les principes scientifiques et les politiques de développement prônées par l'Etat se confronteront aujourd'hui afin d'aboutir à une stratégie cohérente et efficace de promotion et d'amélioration de la race zébu peul.

La contribution du projet ZEPESA est à saluer parce qu'elle s'inscrit dans le cadre de la promotion de l'élevage comme moyen de réduction de la vulnérabilité, objectif inscrit dans le Cadre Stratégique de Lutte contre la Pauvreté (CSLP) et dans le document phare du Ministère des Ressources Animales, le PAPISE.

Tout en sachant que vous ne ménagerez aucun effort pour la réussite de cet atelier, je vous souhaite un bon travail. Je vous confirme par ailleurs l'engagement de l'Administration à vos cotés dans la promotion de la province de l'Oudalan et de ses habitants.

Je déclare ouvert l'atelier de validation des critères de sélection du zébu peul.

Je vous remercie.



## V. COMPTE RENDU DE L'ATELIER

Le 5 mai 2006, le Comité de Pilotage (CP) s'est réuni dans la salle de réunion du Programme de Développement Local de l'Oudalan (PDL/UDL) en séance de travail pour la validation des critères de sélection du zébu peul. Le CP est un cadre de concertation dans la mise en œuvre de l'axe amélioration génétique du projet d'appui au développement du Zébu Peul au Sahel (ZEPESA). Il est composé de scientifiques et de représentants des éleveurs.

Plusieurs structures ont participé à l'atelier, entre autres on peut citer la Direction de l'Intensification et de la Promotion des Productions Animales (DIPPA), le Centre National d'Elevage et d'Amélioration Génétique (CNEAG), l'Institut National de l'Environnement et de Recherche Agricole (INERA), la Direction Régionale des Ressources Animales (DRRA). Le Centre International de Recherche-Développement de l'Elevage en zone Subhumide (CIRDES) invité à l'atelier n'a pas pu prendre part pour une raison de calendrier.

L'atelier a débuté aux environs de neuf heures avec les allocutions des autorités locales. Le mot d'ouverture a été donné par le préfet du département de Gorom-Gorom représentant le Haut Commissaire de la province de l'Oudalan.

Après les discours, les autorités administratives se sont retirées pour permettre aux techniciens de poursuivre l'atelier avec les travaux liés à la thématique.

Après un bref tour de table de présentation des participants, l'équipe de modérateurs composée du directeur provincial des ressources animales et du coresponsable du projet a présenté le programme de l'atelier : Trois communications suivies de discussions sont les principales activités prévues.

La première communication a porté sur la stratégie d'amélioration génétique du projet et l'état d'avancement des activités. La deuxième communication a porté sur un aperçu de trois sous types du zébu peul local rencontrés dans la province de l'Oudalan. Enfin la dernière communication a porté sur les critères de sélection du zébu peul.

On a pu noter une démarche participative du projet ZEPESA dans la mise en œuvre de la stratégie, toute chose qui permet de prendre en compte et de valoriser les connaissances des éleveurs. C'est ainsi que sur le terrain le projet ZEPESA est parvenu avec les éleveurs à la proposition des critères de sélection et la description de certaines caractéristiques de trois sous types du zébu peul. Les critères qui ont cependant été jugés nombreux, non priorisés et non spécifiques aux différentes productions du zébu peul par les scientifiques.

Les communications ont été présentées respectivement par le chargé du programme d'amélioration génétique du projet, le stagiaire chargé de l'étude sur la caractérisation des élevages bovins de la province de l'Oudalan et le porte parole du comité local représentant les éleveurs.

Elles ont été suivies de discussions avec des débats très intéressants qui se sont surtout focalisés sur l'authenticité des trois sous types et la valeur des critères proposés.

A la lumière des échanges, l'atelier a fait des recommandations au projet ZEPESA avant de valider les critères de sélection sous réserve de la prise en compte des observations.

La fin de l'atelier est intervenue aux environs de quatorze heures avec le mot de clôture du directeur régional des ressources animales qui a dit toute sa satisfaction et ses encouragements à de telles initiatives.



## I. SYNTHÈSE DES COMMUNICATIONS ET DES DISCUSSIONS

Les communications qui ont été données au cours de l'atelier ont porté essentiellement sur la stratégie d'amélioration génétique du projet ZEPESA et l'état d'avancement des activités du dit projet du moment où les sujets qui ont fait l'objet des deux dernières communications font partie des activités réalisées par le projet. C'est donc des éléments de l'état d'avancement des activités qui ont été mis en exergue à cause de leur importance.

### ✓ STRATÉGIE D'AMÉLIORATION GÉNÉTIQUE DU PROJET

La stratégie d'amélioration génétique du projet ZEPESA comporte trois (03) principales étapes qui sont ci-après définies.

#### ▪ Lutte contre la consanguinité

Le constat fait par la mission de formulation du projet a fait ressortir clairement que l'un des gros problèmes de l'amélioration génétique du zébu peul au Sahel est la pratique de la consanguinité étroite par les pasteurs et les agropasteurs. La situation résulte du maintien sur une longue période du mâle reproducteur dans le troupeau et du choix du taurillon futur reproducteur dans sa descendance.

Si bien que dans la stratégie d'amélioration génétique du projet, la lutte contre la consanguinité occupe une place importante et constitue la première étape de l'intervention.

Dans la démarche, le temps d'utilisation du taureau reproducteur est limité et fixé à quatre ans au maximum chez les Eleveurs Encadrés (EE). Ainsi après quatre années d'utilisation, le taureau reproducteur est éliminé du troupeau. Il est remplacé par un autre taureau qui est acheté chez un EE.

Dans cette démarche, le projet accompagne les EE à travers la sensibilisation et l'appui à l'acquisition de taureaux de remplacement. Par ce fait, il permet un apport de nouveau sang dans les troupeaux encadrés et donc de lutter contre la consanguinité.

A cette étape, il est indispensable d'identifier les éleveurs à encadrer qui doivent être des éleveurs convaincus et engagés à lutter contre la consanguinité.

#### ▪ Sélection intra-troupeaux

La sélection des animaux est la deuxième étape de cette stratégie. C'est une sélection qui s'opère à l'intérieur du troupeau. Les femelles de bonne lignée laitière sont sélectionnées et mises à la reproduction avec un bon taureau non consanguin choisi comme géniteur. Les montes sont contrôlées et raisonnées. Les meilleurs veaux issus des montes raisonnées sont ensuite sélectionnés et vendus à d'autres éleveurs adhérents au programme. Les produits issus des mauvaises lignées sont éliminés.

La sélection des meilleurs animaux est faite sur la base de critères établis par consensus avec tous les acteurs concernés (éleveurs, projet et scientifiques). La réalisation des montes raisonnées reste l'activité la plus importante à cette étape.

Une des contraintes à l'amélioration génétique dans l'élevage bovin sahélien était l'absence d'élimination de sujets mauvais dans les troupeaux. Cette deuxième étape de la stratégie d'amélioration génétique qui consiste à sélectionner les meilleurs animaux et à éliminer les mauvais contribuera à lever cette contrainte.

#### ▪ Programme intégré de sélection





Le programme intégré de sélection est la dernière étape de la stratégie. Il parachève toute la démarche. Il vise à assurer la durabilité de l'action d'amélioration génétique. En ce sens il pose les véritables bases d'une action durable.

Le programme de sélection est véritablement inspiré de la stratégie d'amélioration génétique du Projet de Soutien à la Diffusion du Zébu Azawak (PSDZA). Ainsi il repose sur les points ci-dessous :

- La diffusion du progrès génétique chez les EE par le biais de géniteurs mâles,
- La participation active des éleveurs sélectionneurs pour permettre la production de taurillons de bonne qualité,
- La mise en place de l'Unité de Testage (UT) pour permettre la sélection et le classement des veaux,
- L'appui scientifique des partenaires techniques.

A travers ce programme, un choix est opéré parmi les EE par les OPE des villages d'intervention et le projet pour désigner les ES. Les ES sont désignés sur la base d'un certain nombre de critères, en occurrence, la disposition de vaches zébu peul de bonne lignée laitière, la conduite individuelle du troupeau, etc. ils remplissent en plus un cahier de charge qui les engage à lutter contre la consanguinité et à réaliser des montes raisonnées, aussi ils s'engagent à appliquer tout le paquet technologique du projet.

Les veaux issus des montes raisonnées sont sélectionnés chez les ES, achetés et transférés à l'UT où ils sont élevés dans de bonnes conditions alimentaires et sanitaires. En fin de croissance, ils sont testés et classés en catégories, les tests réalisés sont des tests de performance de croissance, de vigueur sexuelle, de la qualité du sperme et des tests épidémiologiques.

Les taurillons issus de l'UT et porteurs de progrès génétiques sont diffusés chez les éleveurs. Ainsi la première catégorie est vendue aux ES, la deuxième catégorie aux EE et la troisième catégorie aux Eleveurs Tout Venant (ETV). Les mauvais individus sont regroupés en catégorie quatre qui est destinée à la réforme.

Le fonctionnement de l'UT sera assuré par le projet, les ES mais aussi par des partenaires techniques à travers des appuis réguliers. Ces partenaires sont notamment :

- le Laboratoire National (LN) pour les tests épidémiologiques,
- le CNEAG pour le contrôle des qualités de reproduction, le suivi des performances zootechniques et l'établissement d'une grille de classement,
- la recherche (INERA, université de Ouagadougou et de Bobo-dioulasso) pour l'analyse de la valeur intrinsèque des individus.

## ✓ ETAT D'AVANCEMENT DES ACTIVITES

### ■ Activités en amont de la stratégie d'amélioration génétique

Les activités concernées sont celles qui ont permis de déterminer la zone d'intervention ainsi que les villages. La démarche du projet dans l'intervention est basée sur une couverture modulée de la province de l'Oudalan. Alors que la province de l'Oudalan compte cinq (05) départements et il fallait choisir un seul département d'intervention pour la première année. C'est ainsi que le projet a initié des caravanes d'information à travers toute la province. Une première caravane a été organisée dans les cinq (05) départements de l'Oudalan. Elle a permis de retenir le département de Oursi comme la première zone d'intervention. Une seconde caravane organisée par le projet a permis de parcourir les 21 villages du département de Oursi. Elle a abouti au choix de sept (07) villages d'intervention.



Le choix du département de Oursi et celui des sept (07) villages d'intervention s'est fait selon des critères qui ont été définis par l'équipe technique du projet et qui prenaient en compte certains aspects spécifiques au groupe cible du projet (pasteurs et agropasteurs). Les critères de choix étaient entre autres, le niveau d'organisation des éleveurs, l'importance du cheptel, la vulnérabilité, l'accessibilité des villages.

Pendant la première caravane l'équipe du projet a bénéficié de l'appui du directeur provincial des ressources animales. Il a accompagné l'équipe tout au long de la caravane.

#### ▪ Caractérisation des élevages bovins dans la province de l'Oudalan

La caractérisation des élevages bovins de la province de l'Oudalan a nécessité une étude qui a été conduite par un stagiaire (ingénieur zootechnicien). L'étude avait pour but une proposition de stratégie d'amélioration génétique adaptée au contexte de l'élevage Sahélien. En outre, elle devrait aboutir à une proposition de stratégie d'amélioration de l'alimentation des animaux, l'alimentation étant un volet indispensable à prendre en compte pour atteindre l'amélioration génétique.

La collecte des données s'est faite essentiellement à travers des entretiens directs avec des individus et des causeries-débats en groupes de communauté.

Le volet de l'étude qui a intéressé l'atelier est celui relatif aux caractéristiques des zébus locaux rencontrés dans la province de l'Oudalan. A ce titre, l'étude a permis de recenser trois (03) zébus locaux, tous de la race du zébu peul. Les trois zébus locaux sont en fait des sous types du zébu peul. Il s'agit du zébu gaodji, du zébu atram et du zébu djelgodji. Les trois sous types présentent des traits caractéristiques bien distincts.

Ainsi le sous type gaodji est le plus grand en taille, avec une allure élancée, il a une grosse tête avec de larges et longues oreilles, il a un fanon bien développé et un gros ventre avec un repli de bas ventre bien développé, chez le mâle le fourreau est bien dégagé. Il a une peau épaisse.

Le sous type atram, un peu moins grand que le premier, a une forme un peu ramassée il a également une grosse tête avec un cou moins relevé que chez le zébu gaodji et un fanon bien développé, il a généralement des cornes moyennes. Il a un gros ventre, avec un repli de bas ventre moins prononcé que chez le précédent, le fourreau est un peu dégagé chez le mâle. Il a une peau moins épaisse.

Enfin le sous type djelgodji est le plus petit de taille, il a une forme un peu étriquée par rapport aux deux autres. Il a un cou mince avec un fanon mince et étranglé, les oreilles petites, des cornes sont minces et moyennes. Il n'a aucun repli de bas ventre, chez le mâle le fourreau est très réduit et collé au ventre.

D'une façon générale, les trois sous types présentent une multitude de robe avec queue longue.

L'appréciation des aptitudes des trois sous types par les éleveurs a permis de placer le zébu gaodji en tête, suivi du zébu atram et du zébu djelgodji. En effet selon les éleveurs le zébu Gaodji serait le plus performant en production laitière ainsi qu'en production de viande. Son cuir serait de bonne qualité. Il serait très apte à la marche.

Le zébu atram aurait une production laitière moindre que pour le zébu gaodji et plus que le zébu djelgodji, de même sa valeur bouchère serait légalement moindre à celle du zébu gaodji. Son cuir serait également de bonne qualité. Le zébu atram est moins apte à la marche.

Le zébu djelgodji donnerait moins de lait et moins de viande que les deux premiers, son cuir serait de qualité moindre.



## ■ Identification des éleveurs encadrés

Les éleveurs encadrés sont ceux participant au programme d'amélioration génétique. On distingue parmi eux des éleveurs sélectionneurs qui remplissent un cahier de charge basé sur la qualité et la quantité de leur cheptel. L'adhésion au programme est libre et volontaire.

De façon générale, le projet a diffusé dans les villages d'intervention les informations relatives à la stratégie d'amélioration génétique. Mais de façon plus spécifique, il a informé et sensibilisé les éleveurs sur le programme d'amélioration génétique.

Pendant la phase d'information l'assemblée villageoise constituait le groupe cible du projet. Mais par la suite il a été retenu une organisation professionnelle d'éleveurs (OPE) dans chaque village d'intervention pour approfondir l'information et la sensibilisation des éleveurs. A l'issue de plusieurs séances de sensibilisation, vingt-deux (22) éleveurs appartenant à deux (02) villages d'intervention ont adhéré au programme. Le projet a choisi d'identifier les éleveurs encadrés exclusivement dans ces deux villages à cause de l'importance et la qualité de leurs troupeaux en entendant la tenue de l'atelier de validation des critères de sélection du zébu peul, où les scientifiques auront à se prononcer sur les trois (03) sous types rencontrés. L'adhésion reste donc ouverte aux autres éleveurs des villages d'intervention. Beaucoup d'éleveurs ont par ailleurs déjà exprimé leur intérêt au programme.

Parmi les éleveurs encadrés, huit (08) éleveurs sélectionneurs ont été identifiés dans l'ensemble des deux villages. Cependant toutes les clauses du cahier de charge sont encore à l'étape informelle, il reste donc à les formaliser.

## ■ Etablissement des critères de sélection des animaux

Le projet a animé dans chacun des villages d'intervention des séances de causeries-débats avec les OPE pour établir les critères de sélection du zébu peul. Les différents débats ont été participatifs et la majorité des éleveurs s'est exprimé pour définir les critères.

Aussi dans un souci d'harmonisation des critères avec l'ensemble des éleveurs de la région du Sahel, seize (16) personnes ressources ont été identifiées et interviewées sur les critères de sélection du zébu peul. Des missions ont été organisées à cet effet dans les provinces du Séno, du Soum et du Yagha non encore couvertes par le projet. Les critères définis dans les différentes provinces étaient presque similaires.

A l'issue des entretiens et des tournées d'échange avec les éleveurs, une table de critères a été établie par le projet.

Les critères établis sont propres aux éleveurs, ils ont souvent des fondements socioculturels, mais ils n'ont pas forcément de fondements scientifiques. Si bien que le projet dans sa démarche, a envisagé l'organisation d'un atelier de validation pour permettre aux scientifiques de discuter et donner leurs appréciations des critères. En prélude à cet atelier, il a été organisé un premier atelier pendant le mois d'avril avec les membres du comité local composés des représentants des éleveurs. Lors duquel, les membres du comité local ont apprécié l'ensemble des critères, une harmonisation a été faite en vue de la présentation à l'atelier de validation. Au terme de cet atelier, les critères de sélection du zébu peul se définissaient comme suit :

**Pour le taureau :** un bon taureau doit vérifier les critères ci-après.

1. bon gabarit,
2. lignée d'une bonne vache laitière,
3. beauté,



4. docile,
5. tête relevée et cou dressé,
6. queue longue,
7. oreilles larges,
8. bonne ardeur sexuelle,
9. bonne ossature,
10. bourse homogène et testicules volumineux,
11. peau souple et luisante,
12. bonne disposition de l'épi de poils sur le front,

**Pour la vache :** une bonne vache doit vérifier les critères ci-après.

1. bonne production de lait,
2. beauté,
3. docile et généreuse,
4. dos plat,
5. tête large,
6. oreilles larges,
7. long tronc
8. bassin large,
9. longue queue,
10. mamelle volumineuse et bien fixée,
11. trayons longs et mous,
12. veine mammaire bien développée,
13. peau souple et luisante,
14. fertile,
15. gros ventre,

### ✓ SYNTHÈSE DES DISCUSSIONS

Les discussions ont porté sur l'ensemble des communications qui ont été faites au cours de l'atelier. Mais celles sur l'aperçu des trois sous types du zébu peul local et les critères de sélection de ce zébu ont été beaucoup plus intéressantes. Les interventions des participants relatives à la stratégie d'amélioration génétique du projet ont été moins importantes et ont porté essentiellement sur la pratique des montes raisonnées et le système d'identification des animaux. En effet la réalisation de montes raisonnées est très difficile dans les conditions d'élevage comme celle du Sahel où le système d'élevage est extensif. Il est très délicat de suivre les animaux et d'orienter les montes. Cette activité est sans doute difficile à réaliser mais pas impossible. Elle constitue un défi majeur pour le projet.

L'exposé sur les trois sous types du zébu peul a été attrayant. Le zébu peul Burkinabè connu sous l'appellation zébu peul soudanais n'était pas connu dans ses variétés. L'étude sur la caractérisation des élevages bovins qui a permis de découvrir ces trois sous types donne beaucoup plus de détails sur le zébu peul de la province de l'Oudalan.

La présentation des spécimens a suscité beaucoup de curiosités et d'interrogations au sein des participants. Si bien que certains se posent des questions sur l'authenticité de ces sous types en se demandant si les trois sous types ne sont pas une conséquence de la dégénération d'un caractère du zébu peul soudanais dans un milieu d'élevage où les montes se font de façon aléatoire. D'autres par contre s'intéressent aux détails fournis et encouragent la poursuite de cette initiative qui tend à approfondir les connaissances sur la race locale. C'est ainsi que le projet a été invité à prendre connaissance des conclusions de l'étude sur l'état des ressources



génétiques animales au Burkina Faso qui vient d'être menée par le Ministère des Ressources Animales (MRA) en collaboration avec la FAO, pour une harmonisation des caractéristiques et la poursuite des efforts. La poursuite de l'étude semble nécessaire pour approfondir de manière scientifique les informations déjà existantes.

Pour la mise en œuvre pratique du projet ZEPESA des zones d'ombre persistent chez certains participants quant au sous type à valoriser. Dans la formulation du projet aucune spécification n'avait été faite, la race à promouvoir est le zébu peul, ainsi donc il ne sera pas opéré de choix, tous les trois sous types seront considérés et le choix reviendra aux éleveurs qui sont les bénéficiaires. Cela, d'autant plus que la répartition géographique des sous types n'est pas équitable.

Les critères de sélection du zébu peul qui ont fait l'objet de l'organisation de l'atelier ont suscité beaucoup de réactions de la part des participants. Les participants ont analysé les critères et ont fait des critiques. Grosso modo, les critères sont dans leur ensemble, des critères morphologiques. Etablis par les éleveurs eux-mêmes, les critères ont sans doute des fondements socioculturels, mais ce n'est pas des critères scientifiques. Certains critères scientifiques bien connus comme celui se rapportant à la veine mammaire se trouvent occultés. Il s'avère donc nécessaire de les approfondir avec des critères plus scientifiques.

Des commentaires autour des critères liés à la couleur de la robe, la disposition de l'épi de poils sur la tête ou encore la longueur de la queue ont été fort intéressants et ont enrichi les débats. Cela a même permis à travers les contributions des uns et des autres, d'avoir des informations sur l'existence d'une étude qui a été menée par un compatriote et qui a établi une corrélation entre la longueur de la queue et la production laitière des vaches zébu peul soudanais. Un exemple que le projet ZEPESA a été invité à suivre pour donner une valeur scientifique aux critères socioculturels très souvent utilisés par les éleveurs. En attendant que cela ne se fasse, la préoccupation majeure des participants tourne autour de la priorisation et la classification des critères par option de production pour faciliter la sélection, car les critères établis par les éleveurs sont nombreux et il n'est certainement pas possible de les retrouver tous sur un même animal. La classification des critères pourrait se faire en tenant en compte deux types de production au niveau du Sahel, notamment la production du lait et la production d'animaux destinés aux marchés, car le Sahel est reconnu au niveau national comme étant une région de production d'animaux par excellence. Ainsi deux critères importants sont mis en évidence : la quantité de lait et la fertilité.

Ces discussions sur les critères de sélection ont permis d'orienter le projet quant au choix des critères à mettre en vigueur. A la lumière des débats, il ressort qu'il est très fastidieux de faire la sélection avec l'ensemble des critères présentés. Du reste les critères sur la quantité de lait, la fertilité pourraient être complétés par un ou deux critères morphologiques pour faciliter le travail.

Pendant l'étape de discussion une observation a porté sur la composition du comité local composé des éleveurs et qui ne compte aucune femme alors que semblerait-il que les femmes ont en général le bon cou d'œil qui pourrait bien aider au choix des animaux performants.

### III. CADRES DE CONCERTATION EN AMELIORATION GENETIQUE

Deux (02) cadres de concertation sont prévus dans la mise en œuvre du volet amélioration génétique du projet. Il s'agit du comité local composé exclusivement des éleveurs et du comité scientifique composé de techniciens. Le comité local est déjà mis en place par contre le comité scientifique n'est pas encore formalisé. Les membres sont connus, c'est eux qui ont validé avec le comité local les critères de sélection du zébu peul. Les membres du comité



scientifique sont des personnes qui relèvent des structures de recherche et des services techniques de l'Etat intéressés par l'amélioration génétique.

Ces comités sont à but consultatif pour le projet dans la mise en œuvre de ses activités. L'atelier de validation en est un exemple.

#### IV. RECOMMANDATIONS DE L'ATELIER

A la lumière des échanges, l'atelier a fait des recommandations à l'équipe du projet avant de procéder à la validation des critères de sélection qui sont par ailleurs des critères déjà connus par le MRA. Ainsi il ressort en terme de recommandation ce qui suit :

- prendre attache avec la DIPPA pour l'harmonisation du système d'identification des animaux,
- prendre en compte les femmes dans le comité local,
- prendre connaissance du répertoire des animaux existant au Burkina Faso, réalisé par le MRA en collaboration avec la FAO avant d'approfondir les études sur les trois sous types.
- prioriser et classer les critères de sélection du zébu peul selon les options de production,
- approfondir les critères morphologiques par des études sur le génotype,
- poursuivre la collaboration avec les structures et institutions concernées par l'amélioration génétique,
- élargir le champ de la collaboration aux projets et programmes de la région du Sahel intervenant dans le domaine de l'élevage.

L'équipe du projet à l'issue de l'atelier, a entrepris plusieurs sorties d'entretiens avec les OPE et les personnes ressources qui avaient été impliquées dans l'établissement des critères afin de procéder à la classification selon les options de production et à la priorisation des critères de sélection du zébu peul conformément aux recommandations de l'atelier.

Il ressort de la synthèse des entretiens que les critères ci-après sont prioritaires :

##### ***Pour un bon taureau***

1. bonne lignée laitière
2. bon gabarit,
3. tête relevée,
4. oreilles larges,
5. queue longue,
6. bonne ossature.

##### ***Pour une bonne vache***

1. bonne production de lait
2. docile et généreuse
3. bassin large
4. mamelle volumineuse et bien fixée
5. trayons longs et mous
6. gros ventre
7. fertilité

Les éleveurs ont en général deux objectifs de production : le lait et la production d'animaux pour le marché. Les critères restent valables et pareils pour l'un ou l'autre objectif de production, aucune classification des critères n'est faite par les éleveurs. Toutefois, pour le choix des animaux destinés au marché, ils mettent plus l'accent sur le gabarit chez le taureau et la fertilité chez la vache.

#### V. CONCLUSION

L'atelier de validation des critères de sélection du zébu peul a répondu à bien de préoccupations au niveau du projet, des éleveurs et sans doute de certains participants. Les discussions fort intéressantes ont donné une orientation au projet par rapport aux trois sous types du zébu peul existant et aux critères à prendre en compte dans la sélection. Dans les





critères de sélection le plus important étant les options de production mais aussi le nombre de critères à vérifier. Les critères proposés par les éleveurs sont très nombreux, il est bon de limiter le nombre de critères aux critères qui sont prioritaires.

Le projet ZEPESA, satisfait de la contribution des participants, et en considération des recommandations s'engage à poursuivre la collaboration avec tous les partenaires dans la mise en œuvre de ses activités. Aussi a-t-il prévu dans l'élargissement du comité local de favoriser l'intégration de personnes ressources féminines.

En ce qui concerne les critères de sélection qui ont fait l'objet de l'atelier, le projet envisage désormais travailler prioritairement avec un nombre raisonnable de 4 critères dont le phénotype zébu peul, la valeur laitière de l'animal, la conformation, la longueur de queue. En cas de besoin et de façon spécifique, d'autres critères comme le gabarit, la fertilité ou encore le volume du pis seront considérés pour la sélection du taureau reproducteur ou de la vache. A priori les animaux sélectionnés ne doivent pas présenter de quelconques défauts. Pour les veaux, ces critères seront complétés par la vitesse de croissance qui sera estimée à travers le GMQ et la valeur pondérale de la vache mère. Aussi le projet travaillera sans exclusion avec tous les trois sous types du zébu peul.

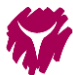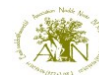

## ANNEXE 1 : Fiche signalétique du ZEPESA

### Présentation du projet

- **Partenariat** : Vétérinaires Sans Frontières (VSF/B) et Association Nodde Nooto (A2N)
- **Démarrage** : 1 Juin 2005
- **Durée** : 4 ans (pour première phase), durée totale 13 ans
- **Localisation** : Province de l'Oudalan
- **Budget prévisionnel** : 1.277.518 € (837.996.875 fcfa) pour la période 2005 – 2009
- **Financement** : 85% par le Fonds Belge de Survie, 15% par VSF/B
- **Groupe cible** : Pasteurs et Agropasteurs de la province de l'Oudalan

### Objectifs du projet

- **Objectif général** : “Améliorer les revenus et la sécurité alimentaires des pasteurs et agropasteurs de la zone sahélienne”
- **Objectif spécifique** : “Augmenter les productions des bovins de race peuls”

### Résultats et axes stratégiques

1. Amélioration durable du potentiel génétique des zébus peuls
2. Amélioration de l'alimentation de la fraction productive du troupeau
3. Installation d'un réseau de santé animale de proximité
4. Renforcement des O.P.E
5. Diminution de la vulnérabilité des familles en situation précaire
6. Implication d'avantage des femmes dans les activités d'élevage

### Approche du projet

- Couverture géographique modulée (1-3-5)
- Approche participative et orienté vers la demande locale
- Cofinancement des activités (éleveurs, FDL, Communes, etc.)
- Maîtrise d'ouvrage confiée aux OPE
- Organisation et professionnalisation des éleveurs
- Concertation (CCDE, CCSA, CCAG, ....)
- Sous-traitance

### Programme de mise en place de l'intervention

| IOV                              | A1 | A2 | A3  | A4  |
|----------------------------------|----|----|-----|-----|
| Départements couverts            | 1  | 3  | 4   | 5   |
| Villages couverts                | 3  | 8  | 18  | 25  |
| Éleveurs sélectionneurs          | 9  | 24 | 54  | 75  |
| Taureaux sélectionnés introduits | 8  | 29 | 108 | 206 |
| OPE encadrées                    | 5  | 14 | 33  | 45  |
| Familles vulnérables             | 15 | 43 | 101 | 154 |





---

## ANNEXE 2 : Programme de l'atelier

|                   |                                                                                                                                                                                                                                                                                                                                 |
|-------------------|---------------------------------------------------------------------------------------------------------------------------------------------------------------------------------------------------------------------------------------------------------------------------------------------------------------------------------|
| 09h00mn – 09h15mn | - Installation des participants                                                                                                                                                                                                                                                                                                 |
| 09h15mn – 10h00mn | - Discours d'ouverture de l'atelier<br><i>Chef de projet ZEPESA</i><br><i>Directeur provincial des ressources animales représentant le</i><br><i>Directeur régional des Ressources Animales du Sahel</i><br><i>Préfet du département de Gorom-Gorom, représentant le Haut</i><br><i>Commissaire de la province de l'Oudalan</i> |
| 10h00mn – 10h30mn | - Communication sur la stratégie d'amélioration génétique du projet ZEPESA<br><i>Chargé de l'amélioration génétique du projet ZEPESA</i>                                                                                                                                                                                        |
|                   | - Présentation de l'état d'avancement des activités liées à l'amélioration génétique<br><i>Chargé de l'amélioration génétique du projet ZEPESA</i>                                                                                                                                                                              |
|                   | - Bref aperçu de trois sous types de la race zébu peul rencontrés dans la province de l'Oudalan<br><i>Stagiaire chargé de l'étude sur la caractérisation des élevages bovins de la province de l'Oudalan</i>                                                                                                                    |
| 10h30mn – 11h30mn | - Discussions                                                                                                                                                                                                                                                                                                                   |
| 11h30mn – 12h00   | - Pause                                                                                                                                                                                                                                                                                                                         |
| 12h00mn – 12h30mn | - Communication sur les critères de sélection du zébu peul<br><i>Porte parole des éleveurs</i>                                                                                                                                                                                                                                  |
| 12h30mn – 13h30mn | - Discussions                                                                                                                                                                                                                                                                                                                   |
| 13h30mn – 14h00mn | - Synthèse des travaux<br><i>Modérateurs</i>                                                                                                                                                                                                                                                                                    |
| 14h00mn – 14h15mn | - Clôture de l'atelier<br><i>Directeur régional des ressources animales</i>                                                                                                                                                                                                                                                     |

## **ANNEXE 3 : Termes de Référence de l'atelier**

### **Contexte**

Le projet d'appui au développement du ZÉbu PEul au SAhel (ZEPESA) vise l'amélioration des revenus et de la sécurité alimentaire des populations du Sahel par l'augmentation des productions des bovins de race Peul. Il a vu le jour grâce à un partenariat entre une ONG locale A2N et une ONG internationale VSF/B. La durée du projet est de 13 ans avec une phase d'essai de 4 ans dans la province de l'Oudalan.

Le projet a une stratégie d'intervention basée essentiellement sur les 6 axes ci-après :

- l'amélioration du potentiel génétique de la race Zébu Peul
- l'amélioration des conditions alimentaires de la fraction productive
- l'amélioration de la couverture sanitaire par la mise en place d'un réseau de santé animale de proximité
- le renforcement des capacités des Organisations Professionnelles d'Éleveurs (OPE)
- l'appui aux organisations professionnelles d'éleveuses
- l'appui aux familles vulnérables

Dans l'exécution du projet, il est prévu une bonne collaboration avec les structures déconcentrées de l'Etat notamment la DRRA, la DPRA, la direction provinciale de l'action sociale et celle de l'Alphabétisation et de l'Education de Base. La collaboration doit s'étendre également aux structures de recherche scientifique nationales telles que l'INERA, Le CNEAG, ou encore le CIRDES.

Les structures déconcentrées de l'Etat sont sollicitées pour l'accompagnement du projet dans la mise en œuvre des actions relevant de leurs domaines de compétences, de même l'expertise des structures de recherche scientifique est demandée pour orienter les éleveurs sélectionneur dans leur choix et valider leur décision en ce qui concerne l'amélioration génétique.

Les axes ci-dessus cités ont fait l'objet de planification et le premier axe portant sur l'amélioration génétique qui intéresse plus particulièrement les structures comme la DRRA, DPRA, INERA, CNEAG et le CIRDES comporte dans son déroulement plusieurs étapes :

#### **Lutter contre la consanguinité par la limitation du temps de séjour du taureau au sein du troupeau**

- Caractériser les différents types d'élevage
- Identifier les éleveurs à encadrer
- Organiser et tenir des séances de sensibilisation sur la lutte contre la consanguinité
- Suivi-évaluation de l'adhésion des éleveurs au programme

#### **Assurer le renouvellement du reproducteur à partir des meilleurs taurillons sélectionnés chez d'autres éleveurs**

- Etablir les critères de sélection des meilleurs animaux avec les OPE et les personnes ressources
- Echanger avec une mission d'appui en amélioration génétique (CNEAG/MRA, INERA) sur les critères établis avec les OPE et les personnes ressources
- Renforcer les capacités des OPE dans la sensibilisation et dans l'identification des éleveurs sélectionneurs
- Sélectionner les animaux améliorateurs (femelles et mâles) chez les éleveurs encadrés

## **Réaliser des montes raisonnées et sélectionner les meilleurs mâles issus de ces montes**

- Elaboration d'une stratégie d'accompagnement des éleveurs sélectionnés
- Etablir un protocole d'accord avec les éleveurs sélectionnés

### **Justification**

De façon spécifique la collaboration des structures scientifiques ci-dessous citées est attendue dans la mise en œuvre des activités liées à l'amélioration génétique. Ceci a motivé le projet à penser à la mise en place d'un comité scientifique composé de chercheurs des structures comme l'INERA, le CNEAG, et le CIRDES pour piloter les actions relatives à l'amélioration génétique. Ce comité scientifique sera chargé d'accompagner le comité local composé de personnes ressources de l'aire d'intervention du projet.

Dans ce processus qui réunit chercheurs et éleveurs locaux, le projet vise la cohabitation des connaissances traditionnelles et scientifiques. La prise en compte des connaissances des éleveurs et de leurs préoccupations pourrait permettre de pérenniser les actions qui seront entreprises.

Dans la mise en œuvre du plan opérationnel du projet, l'équipe technique a procédé au choix des villages adhérents ainsi que des éleveurs à encadrer avec qui elle a établi des critères de sélection des animaux. Ces critères ont été discutés d'abord avec les éleveurs sélectionneurs identifiés dans les villages adhérents qui sont des personnes ayant une bonne connaissance du zébu peul, ils sont choisis parmi les éleveurs encadrés et par eux même. Ensuite les critères ont été discutés et amendés par un comité local composé de personnes ressources représentant chacune des 4 provinces de la région du Sahel.

Afin de faire une table définitive de critères pour l'ensemble de la région, il nous a semblé indiqué de soumettre les critères proposés par les éleveurs adhérents et les personnes ressources aux scientifiques qui travaillent dans le domaine de la recherche et qui sans doute disposent de grandes expériences en matière de sélection des animaux améliorateurs.

Si bien que nous avons pensé à l'organisation de cette rencontre qui se veut une rencontre de validation des critères proposés par les éleveurs. Cette rencontre est la deuxième qui se tient dans le cadre du projet après celle qui a vu le lancement officiel du projet en décembre. Du reste toutes ces rencontres, comme précisé un peu plus haut, s'inscrivent dans le cadre d'une bonne collaboration entre le projet et les autres partenaires.

Mais la rencontre de validation a tout de même une certaine particularité en ce sens qu'elle a lieu exclusivement pour la mise en œuvre de l'axe « *amélioration du potentiel génétique du zébu peul* » et c'est une rencontre du comité technique qui regroupe le comité scientifique et le comité local.

### **Objectifs :**

De façon globale la rencontre du comité de pilotage vise à assurer un suivi scientifique des activités du projet. Mais de façon spécifique, elle vise à :

1. Partager la vision du projet sur l'amélioration génétique du zébu peul
2. Harmoniser les points de vue sur les caractéristiques du zébu peul
3. Amender et valider les critères de sélection proposés par les éleveurs sélectionneurs

### **Résultats attendus :**

1. la stratégie d'amélioration génétique du projet est largement partagée par les partenaires
2. Les points de vue sont harmonisés sur les caractéristiques du zébu peul
3. Une table de critères de sélection de meilleurs animaux est disponible

### **Méthodologie**

La rencontre est prévue pour se dérouler le vendredi 05 Mai à 9 heures à Gorom-Gorom, chef lieu de la province de l'Oudalan.

A l'ouverture plusieurs allocutions dont celles du Chef de projet et du Directeur Régional des Ressources Animales auront lieu, ensuite, un programme des activités viendra préciser le déroulement de la rencontre.

Les activités envisagées sont entre autres :

- Une communication de l'équipe du projet sur la stratégie d'amélioration génétique du projet, l'état d'avancement des activités liées à l'amélioration génétiques.
- Une communication du comité local sur les critères de sélection des animaux
- Des discussions avec l'ensemble des participants notamment du comité scientifique interviendront au niveau de chaque communication pour harmoniser les avis.

Aussi beaucoup de préoccupations seront partagées pour convenir de la même chose avec l'ensemble des acteurs.

La rencontre est prévue pour la seule journée du vendredi. Le programme des activités précisera la fin de la séance.

## ANNEXE 5 : Principales caractéristiques de la race zébu peul

### 1/ Ethnologie :

Le Zébu Peul burkinabé fait partie du groupe des Zébus Ouest Africain à longues cornes en lyre. Il est une branche du Zébu Peul Soudanais qui se retrouve dans toute la partie sud du Mali. Le berceau d'origine semble localisé dans l'Aïr (Niger)

### 2/ Caractéristiques :

Le zébu Peul est un bovin de petite taille (1,30 m pour le mâle, 1,20 m pour la femelle) et le poids adulte varie de 300 à 350 kg pour les taureaux et de 230 à 280 kg pour les vaches. Les robes sont variées, mais souvent grises avec des tâches sombres (gris moucheté), parfois rouge, pie rouge ou pie noir.

### 3/ Aptitudes :

\* A l'origine cette race a été choisie pour son aptitude laitière. Les vaches ont une production moyenne oscillant entre 550 et 660 kg par lactation dont 65-70% sont consommés par le veau. Lorsque les conditions d'alimentation sont bonnes, la production laitière peut atteindre 860 kg en 8 mois de lactation.

\* L'utilisation du Zébu Peul pour la traction est en progression constante dans le pays. En zone soudanienne et soudano-guinéenne on assiste à de nombreux croisements taurins x zébus.

\* Le Zébu Peul a également une bonne aptitude viandeuse puisque, d'une part, le rendement carcasse peut atteindre 48% et que, d'autre part, la réponse à l'embouche donne de bons résultats (GMQ de 500 à 900 gr/j).

### 4/ Principaux paramètres zootechniques\*1 (situation actuelle et situation escomptée à l'horizon de 10 ans)

| Paramètres                                                | Actuelle |     | Améliorée |     | Différent | Facteurs déterminants<br>Pour l'amélioration<br>des performances                                                                                    |
|-----------------------------------------------------------|----------|-----|-----------|-----|-----------|-----------------------------------------------------------------------------------------------------------------------------------------------------|
| 1. REPRODUCTION                                           |          |     |           |     |           | *Amélioration génétique (lutte<br>contre la consanguinité +<br>sélection (++)<br>*Amélioration alimentation (+)<br>*Prophylaxie (+)                 |
| Age à la 1° mise bas (mois):                              | 48       |     | 42        |     |           |                                                                                                                                                     |
| Intervalles entre mises bas (mois) :                      | 22       |     | 20        |     |           |                                                                                                                                                     |
| Taux moyen de fécondité (%) :                             | 51,8%    |     | 57%       |     | 10%       |                                                                                                                                                     |
| Taux de vaches dans le troupeau (%) :                     | 41       |     | 41%       |     |           | *Prophylaxie (++)<br>*Amélioration génétique (+)<br>*Amélioration alimentation (+)                                                                  |
| 2. PARAMETRES ZOOTECHN.                                   |          |     |           |     |           |                                                                                                                                                     |
| Taux de mortalité des jeunes 0-1 an (%) :                 | 15%      |     | 12%       |     | -20%      |                                                                                                                                                     |
| Taux de mortalité des adultes (%) :                       | 6%       |     | 5%        |     | -16,7%    |                                                                                                                                                     |
|                                                           | M        | F   | M         | F   |           | *Amélioration alimentation<br>(++)<br>*Amélioration génétique (+)<br>*Prophylaxie (+)                                                               |
| Poids à la naissance (kg) :                               | 18       | 17  | 19        | 18  |           |                                                                                                                                                     |
| Poids à 3 ans (kg) :                                      | 185      | 175 | 200       | 185 | 8,1%      |                                                                                                                                                     |
| Poids des adultes (kg) :                                  | 300      | 250 | 320       | 280 |           |                                                                                                                                                     |
| Poids de vaches réformées (kg) :                          |          | 225 |           | 252 |           | *Amélioration de la gestion et<br>de l'exploitation du troupeau<br>(++)                                                                             |
| Age de réforme (mois) :                                   | 186      |     | 168       |     |           |                                                                                                                                                     |
| Carrière de la vache (mois) :                             | 138      |     | 126       |     |           |                                                                                                                                                     |
| 3. PARAMETRES DE PRODUCTION                               |          |     |           |     |           | *Amélioration génétique (++)<br>*Amélioration alimentation<br>*prophylaxie (+)<br>*Amélioration de la gestion de<br>l'exploitation du troupeau (++) |
| Nombre de veaux produits par vache :                      | 7,0      |     | 7,0       |     |           |                                                                                                                                                     |
| Production numérique (1 an) / mère / an :                 | 0,44     |     | 0,50      |     | 13,6%     |                                                                                                                                                     |
| Taux de croît brut :                                      | 13,8%    |     | 16,1%     |     | 16,3%     |                                                                                                                                                     |
| Taux d'exploitation (productivité numérique) :            | 11,9%    |     | 14,8%     |     | 24,5%     |                                                                                                                                                     |
| Taux de croît net :                                       | 2,0%     |     | 1,3%      |     | -33,5%    |                                                                                                                                                     |
| Poids moyen des animaux exploités (kg vif) :              | 210      |     | 200       |     | -4,9%     |                                                                                                                                                     |
| Productivité pondérale du troupeau (kg vif) :             | 25       |     | 29,6      |     | 18,4%     |                                                                                                                                                     |
| Production laitière (L/j) (hors consomm. Veau)<br>*4 :    | 1,07     |     | 1,2       |     | 12,7%     | *Amélioration génétique (++)<br>*Amélioration alimentation (+)<br>*Prophylaxie (+)                                                                  |
| A                                                         | 180      |     | 210       |     | 16,7%     |                                                                                                                                                     |
| Prod. Laitière/vache lact./période (hors cons.<br>veau) : | 192      |     | 25        |     | 31,5%     |                                                                                                                                                     |

\*1 Paramètres établis sur la base de l'étude IEPC

\*2 Le projet devra viser, en cours de 2<sup>o</sup> phase, une limitation de l'augmentation du cheptel de façon à maintenir un équilibre avec les ressources naturelles disponibles

\*3 Dans le même ordre d'idée, le projet devra encourager une exploitation plus rapide des mâles.

\*4 Production laitière = quantité de lait réellement trait en tenant compte d'une pondération entre les vaches bonnes laitières (niveau de traite voisin de 90%) et les vaches mauvaises laitières (niveau de traite variant de 0 à 30% suivant les saisons).

## **ANNEXE 7: Liste des participants**

| N° | Nom et prénom (s)       | Structure              | Poste                   | Adresse                  |
|----|-------------------------|------------------------|-------------------------|--------------------------|
| 1  | Paré Aimé               | CNEAG /Ouagadougou     | Directeur               | 50303425                 |
| 2  | Kocty Diara             | CNEAG/Ouagadougou      | Suivi-évaluation        | 50303425                 |
| 3  | Sana Oumarou            | DIPPA/Ouagadougou      | Directeur               | 50306689                 |
| 4  | Sawadogo P. Moumouni    | DRRA/Sahel             | Directeur               | 40460393                 |
| 5  | Ouédraogo Hamadou       | INERA/Dori             | Chercheur               | 70174950                 |
| 6  | Doulikoum Eugène        | PSDZA/Dori             | Coordonnateur de zone   | 70208076                 |
| 7  | Maïga A. Nouhoun        | A2N/Dori               | Commissaire aux comptes | 40460301                 |
| 8  | Pindé Souleymane        | DPRG/Gorom-Gorom       | Directeur               | 40469080                 |
| 9  | Yacouba Idrissa         | BC/Impact Plus/Markoye | Coordonnateur           | 40469911                 |
| 10 | Luca Fabozzi            | ZEPESA/Gorom-Gorom     | Chef de projet          | 40469124                 |
| 11 | Hama Sambaré Maurice    | ZEPESA/Gorom-Gorom     | Coresponsable du projet | 40469124                 |
| 12 | Boureima Hama           | ZEPESA/Gorom-Gorom     | Formation/Animation     | 40469124                 |
| 13 | Tall Aïssata            | ZEPESA/Gorom-Gorom     | Genre                   | 40469124                 |
| 14 | Bognana Rigobert Tuansi | ZEPESA/Gorom-Gorom     | Amélioration génétique  | 40469124                 |
| 15 | Boureima Guidado        | ZEPESA/Gorom-Gorom     | Animateur               | 40469124                 |
| 16 | Zio Drissa              | ZEPESA/Gorom-Gorom     | Stagiaire/Zootecien     | 40469124                 |
| 17 | Amadou Issa             | ZEPESA/Gorom-Gorom     | Interprète              | 40469124                 |
| 18 | Issa Mamoudou           | Comité Local           | Membre                  | Département de Oursi     |
| 19 | Saïdou Ag Madiane       | Comité Local           | Membre                  | Département de Oursi     |
| 20 | Hassane Adama           | Comité Local           | Membre                  | Département de Oursi     |
| 21 | Salou Hama              | Comité Local           | Membre                  | Département de Oursi     |
| 22 | Boucoun Boureima        | Comité Local           | Membre                  | Département de Markoye   |
| 23 | Ly Abidine              | Comité Local           | Membre                  | Département de Tin-Akoff |
| 24 | Hassane Hamadoum        | Comité Local           | Membre                  | Département de Déou      |
| 25 | Diallo Hamadou Ousmane  | Comité Local           | Membre                  | Province du Séno         |
| 26 | Oumarou Abdoulaye       | Comité Local           | Membre                  | Province du Yagha        |
| 27 | Dicko Boureima          | Comité Local           | Membre                  | Province du Soum         |
