# Supplementary material
Source: MDPI journal article supplement (https://www.mdpi.com/2071-1050/13/4/2125)
Supplement: s1 [file s1]

**MINISTERE DES RESSOURCES ANIMALES**

-----  
**SECRETARIAT GENERAL**  
-----

**BKF/017**

**PROJET D'AMELIORATION DE L'ELEVAGE  
DU ZEBU AZAWAK ET DE GESTION  
DURABLE DES RESSOURCES PASTORALES  
(Azawak-Ressources Pastorales)**

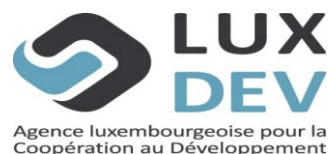

## **RAPPORT DE CAPITALISATION DU PROJET DE SOUTIEN A LA DIFFUSION DU ZEBU AZAWAK PHASE II**

**Octobre 2011**



## TABLE DES MATIERES

|                                                                                                                                     |    |
|-------------------------------------------------------------------------------------------------------------------------------------|----|
| 1 <sup>ère</sup> PARTIE : L'UNION NATIONALE DES ELEVEURS D'AZAWAK DU BURKINA (UNEAB)<br>ET LES GROUPEMENTS D'ELEVEURS D'AZAWAK..... | 4  |
| I. L'UNION NATIONALE DES ELEVEURS D'AZAWAK DU BURKINA (UNEAB).....                                                                  | 5  |
| 1. Attribution, Financement, actions et gestion de l'UNEAB .....                                                                    | 5  |
| 2. Analyse critique de l'UNEAB .....                                                                                                | 6  |
| II. LES GROUPEMENTS D'ELEVEURS D'AZAWAK.....                                                                                        | 7  |
| 1. Attribution, Financement, Actions et Gestion.....                                                                                | 7  |
| 2. Analyse critiques du fonctionnement des groupements .....                                                                        | 8  |
| 2 <sup>e</sup> PARTIE : LES ACTIONS DE RENFORCEMENT DES CAPACITES MENEES PAR LE<br>PSDZA II .....                                   | 10 |
| I. FORMATIONS ET VOYAGES D'ETUDES .....                                                                                             | 11 |
| 1. Thèmes des formations dispensées aux groupements : .....                                                                         | 11 |
| 2. Voyages d'études réalisés au profit des groupements : .....                                                                      | 11 |
| II. EVALUATION DES FORMATIONS ET VOYAGES D'ETUDES.....                                                                              | 11 |
| 1. Les critères d'évaluation .....                                                                                                  | 11 |
| 2. Analyse critique des formations et voyages d'études effectuées.....                                                              | 12 |
| 3 <sup>e</sup> PARTIE : LES UNITES ECONOMIQUES FONCTIONNELLES MISES EN PLACE .....                                                  | 15 |
| I. MAGASINS DE SPAI.....                                                                                                            | 16 |
| II. ATELIERS DE PRODUCTION DE BLOCS MULTI NUTRITIONNELS.....                                                                        | 16 |
| III. TROUSSES VETERINAIRES .....                                                                                                    | 17 |
| IV. INFRASTRUCTURES D'ELEVAGE INDIVIDUELLES.....                                                                                    | 17 |
| 4 <sup>e</sup> PARTIE : ACTIONS D'AMELIORATION GENETIQUE.....                                                                       | 19 |
| I. SCHEMA DE SELECTION .....                                                                                                        | 20 |
| II. ELEVEURS SELECTIONNEURS : Résultats ; nombre d'animaux sélectionnés .....                                                       | 21 |
| III. EVOLUTION DES PARAMETRES ZOOTECHNIQUES.....                                                                                    | 21 |
| IV. EVOLUTION DU CHEPTEL .....                                                                                                      | 22 |
| CONCLUSION GENERALE .....                                                                                                           | 23 |
| ANNEXES.....                                                                                                                        | 24 |



## INTRODUCTION

Le projet BKF/017 « Projet d'amélioration de l'élevage du zébu Azawak et de gestion durable des ressources pastorales » (Azawak - Ressources Pastorales), fait suite au Projet de Soutien à la Diffusion du Zébu Azawak (PSDZA) qui s'est exécuté en deux phases, une première phase, de septembre 2001 à septembre 2003 et une seconde phase de d'octobre 2003 à juin 2008. Avant la mise en œuvre des actions de la nouvelle phase, il était opportun pour l'unité de gestion du projet, de faire une étude de capitalisation des phases précédentes du projet et notamment de la deuxième phase (PSDZA II). En rappel, le projet BKF/017 a officiellement démarré ses activités en janvier 2011, d'où une période d'inactivité du projet auprès des éleveurs précédemment encadrés. Ce qui sous-tend qu'après l'évaluation finale du PSDZA II effectuée 2008, la situation a inévitablement évoluée auprès de la population cible. Ce qui justifie l'exécution de la présente étude de capitalisation et d'actualisation des données avant toutes actions en faveur de la population cible. Cette approche permettra de mieux orienter les actions entreprises pour la présente phase du projet et de faire des recommandations tendant à l'atteinte des objectifs fixés.

La méthodologie adoptée pour l'étude a consisté à définir des orientations claires relatives aux attentes et à responsabiliser l'équipe technique du projet pour mener des investigations de terrain à travers une revue documentaire et la conduite d'une enquête légère auprès des anciens bénéficiaires du projet.

Les investigations ont permis d'une part de renseigner la situation de référence de la plupart des indicateurs définis dans le cadre logique et d'autre part de dégager des forces et faiblesses des actions menées et surtout de proposer des solutions à prendre en compte dans la mise en œuvre du nouveau projet en démarrage.

Le présent rapport s'articule autour des quatre parties :

- l'Union nationale des éleveurs d'Azawak du Burkina (UNEAB) et les groupements d'éleveurs d'Azawak ;
- Renforcement de capacités menées par le PSDZA II ;
- Unités économiques fonctionnelle mises en place;
- Action d'amélioration génétique.



**1<sup>ère</sup> PARTIE : L'UNION NATIONALE DES ELEVEURS D'AZAWAK DU BURKINA  
(UNEAB) ET LES GROUPEMENTS D'ELEVEURS D'AZAWAK**



## **I. L'UNION NATIONALE DES ELEVEURS D'AZAWAK DU BURKINA (UNEAB)**

Dans le cadre de la mise en place des activités de la première phase du Projet de Soutien à la Diffusion du Zébu Azawak (PSDZA) dont l'exécution s'est déroulée de 2000 à 2003, une sensibilisation a eu lieu pour l'émergence de groupements d'éleveurs en vue de promouvoir un développement communautaire solidaire. Ainsi, quatre (04) groupements d'éleveurs a vu le jour dans les localités de Ouagadougou, Djibo, Dori et Yalgo.

Au cours de la deuxième phase du projet (2003 - 2008), le nombre de groupements d'éleveurs d'azawak a évolué de quatre (4) à onze (11) avec la création de sept nouveaux groupements dans les localités de Ziniaré, Aribinda, Kelbo, Pobé Mengao, Bani, Gorom Gorom et Taparko. Les différents groupements ont cohabité pendant un certain temps sans une relation fonctionnelle proprement dite. En fin 2005 et début 2006, dans le cadre d'un appui pour l'élaboration des programmes d'activités triennaux, l'absence d'affiliation des groupements à une faîtière a été soulignée. C'est ainsi que des échanges informels ont eu lieu entre les différents acteurs (éleveurs et agents) et ont conduit à l'organisation, les 20 et 21 avril 2006 à Dori, d'un atelier de réflexion, pour la mise en place d'une faîtière des groupements d'éleveurs d'Azawak nommée Union Nationale des Eleveurs d'Azawak (UNEAB) du Burkina.

### **1. Attribution, Financement, actions et gestion de l'UNEAB**

#### **1.1. Attributions de l'UNEAB**

Dans le cadre de ses attributions, l'UNEAB s'engage à :

- aider à la résolution des problèmes d'accès aux ressources pastorales (foncier, eau, bois) auprès des structures administratives ;
- informer, sensibiliser et former les membres sur les circuits d'approvisionnement en intrants zootechniques et vétérinaires, en reproducteurs Azawak et sur les circuits de commercialisation des animaux et produits d'élevage ;
- contribuer à mettre en relation les groupements membres avec les autres organisations d'éleveurs et les institutions de financement ;
- aider à acquérir des reproducteurs Azawak de qualité ;
- aider à acquérir des intrants (SPAI et produits vétérinaires) en quantité et qualité ;
- aider à trouver des débouchés stables ;
- favoriser les échanges d'expériences entre les groupements d'éleveurs d'Azawak du Burkina et les organisations socio - professionnelles similaires du Mali et du Niger ;
- améliorer le niveau de technicité des membres à travers la diffusion des techniques et technologies performantes en matière de conduite d'élevage ;
- assurer le plaidoyer auprès des partenaires techniques et financiers.

#### **1.2. Sources de financement de l'UNEAB**

La principale source de financement de l'UNEAB repose essentiellement sur le fonds de roulement reçu du PSDZA II, les droits d'adhésion, les cotisations, les crédits, les subventions et la vente des sous-produits agro-industriels (SPAI). Elle est affiliée à deux Banques à savoir la Banque Régionale de Solidarité (BRS) qui reçoit les fonds propres de l'Union et la Banque of Africa (BOA) qui héberge les fonds de roulement.

#### **1.3. Participation de l'UNEAB aux activités du PSDZA II**

Les activités du PSDZA auxquelles l'UNEAB a contribué à mettre en œuvre auprès de ses membres depuis le début de sa création se résument essentiellement à :

- l'approvisionnement en Sous produits agro industriel (SPAI) : 1 770 tonnes représentant une valeur de 176 421 055 FCFA, transport et manutention y compris ;



- la participation à l'approvisionnement en animaux : les membres de l'UNEAB ont participé à divers niveaux (Burkina Faso, Mali et Niger) aux négociations, à la sélection et à l'achat des animaux au profit de leurs membres ;
- la participation à l'organisation du Concours meilleurs éleveurs d'Azawak et à la journée de l'Azawak ;
- la participation à des formations, rencontres d'échanges, missions d'évaluation, instances décisionnelles et activités diverses.

#### **1.4. Outils de gestion de l'UNEAB**

Afin de contribuer à l'atteinte des objectifs assignés à l'UNEAB, des documents et des outils ont été élaborés. Il s'agit entre autres : des Statuts et Règlement intérieur ; du Manuel de procédures de gestion administrative, financière et comptable ; du Journal / Cahier de banque.

## **2. Analyse critique de l'UNEAB**

L'UNEAB a été créée afin de répondre à des attentes bien précises. Elle a tant bien que mal fait son parcours de chemin avec des acquis à son actif mais aussi des faiblesses qu'il faille souligner :

### **2.1. Instances de gouvernance de l'UNEAB**

Les membres du bureau exécutif (BE) sont issus des 11 groupements membres de l'UNEAB. Or, les groupements sont repartis dans six provinces, éloignées les uns des autres. Cela n'est pas sans conséquence sur la tenue des différentes instances de gouvernance de l'union notamment les réunions de bureau qui doivent se tenir normalement une fois par trimestre. L'éloignement des membres entraîne aussi des coûts de communication et de déplacement élevés. Tout ceci a pour corolaire le mauvais fonctionnement de certains organes de gestion et de contrôle. Afin de dynamiser l'UNEAB, le système de gestion actuel mérite d'être repensé.

Par ailleurs, selon les textes en vigueur au sein de l'UNEAB, les membres du BE et du Comité de Contrôle (CC) sont élus pour un mandat de 3 ans renouvelable une fois. Depuis la création de l'Union en 2006, cette disposition est respectée. Le dernier renouvellement des instances dirigeantes s'est effectué le 05 septembre 2009.

En se fiant à la composition de la structure dirigeante (Annexe 1), sur 11 membres, aucune femme n'y figure. Ce qui suscite des interrogations sur le respect de la parité homme/femme, qui du reste, fait allusion en partie à l'aspect genre. L'UNEAB sera nécessairement interpellée sur la question afin qu'elle soit en phase avec les grandes orientations politiques de l'heure au Burkina Faso. Néanmoins sur un effectif total de 312 membres, 71 sont des femmes.

### **2.2. Niveau des moyens financiers**

Comme rappelé plus haut, les sources de financement de L'UNEAB sont très limitées. Malgré l'entrée régulière des cotisations de ses membres et le fond de roulement rétrocédé par le PSDZA II, l'UNEAB est confrontée à des difficultés de financement de ses activités. La cherté, la rareté et l'éloignement des sources d'approvisionnement notamment en animaux de bonne qualité et en SPAI est une contrainte majeure qui empêche de dégager des frais pour la conduite d'autres activités (Rencontres, missions d'évaluation, plaidoyers auprès des bailleurs de fonds, etc.). Pour le cas particulier des SPAI, une concurrence est souvent constatée entre les SPAI acquis par l'UNEAB au profit de ses membres et ceux subventionnés par l'Etat pendant les périodes de soudure. Ce qui amène les membres des groupements à délaisser les SPAI qui leur étaient destinés au profit de ceux subventionnés par l'Etat. Certes, ce qui est normal en terme économique. Par ricochet, cette situation influe négativement la stratégie mise en place pour approvisionner les groupements en SPAI.



Par ailleurs, l'UNEAB rencontre par endroit un problème de recouvrement de ses fonds auprès de certains groupements notamment ceux de Ouagadougou, Djibo, Kelbo, Dori et Taparko. A la date du 28/02/2011, ces derniers devaient à l'UNEAB un montant total de 4 876 575 FCFA contracté pour achat d'animaux et de SPAI.

Pour la phase actuelle du projet, le fond de roulement de l'UNEAB sera renforcé et des partenariats tissés dans le cadre de la Fédération des Unions Nationales des Eleveurs d'Azawak (FUNENZA) afin de contribuer à faciliter l'acquisition des animaux de qualité à des coûts raisonnés. Cependant, une rétrospection doit être faite sur le mécanisme de recouvrement des fonds au sein de l'UNEAB et des groupements membres. Il est donc souhaitable que l'UGP du projet BKF/017 et l'UNEAB puisse trouver de manière consensuelle l'approche à retenir pour la rétrocession des animaux et des SPAI aux groupements.

### **2.3. Niveau de maîtrise des procédures comptables**

L'UNEAB s'est dotée depuis le 27 juin 2008 d'un manuel de procédures de gestion administrative, financière et comptable. Cependant la mise en œuvre de ses dispositions n'est pas effective. Des insuffisances ont été constatées dans les procédures comptables utilisées. C'est l'ex comptable du PSDZA qui tenait les comptes de l'union, les contrôles sont presque inexistantes et le tout couronné par l'absence d'audits.

Pour la phase du projet BKF/017, des dispositions ont été prises afin de renforcer la gestion administrative et comptable de l'UNEAB par le recrutement d'un personnel qualifié qui aidera la structure à avoir des compétences requises.

### **2. 4. Niveau de planification des activités**

Dans les dévolutions d'une structure comme l'UNEAB, il est de coutume, l'élaboration de programmes d'activités annuels ou multi-annuels assortie d'un budget et notamment celui du fonctionnement. Ce qui n'est pas toujours le cas à l'UNEAB. Le programme annuel d'activités est généralement incomplet du fait de l'absence de données quantitatives et de budget dans les programmes de certains groupements membres.

Mais force est de souligner que différentes formations ont été organisées par le PSDZA II pour le renforcement des capacités des membres dans les domaines défailants. Mais leur application sur le terrain est très faible à cause de l'analphabétisme de plusieurs membres d'où des difficultés sérieuses. Cela interpelle le nouveau le projet BKF/017 à définir une nouvelle approche dans le choix des thèmes de formation et la méthodologie pour l'adapter au public cible.

### **2.5. Environnement de travail de l'UNEAB**

L'UNEAB n'a toujours pas un siège ou ses membres peuvent s'adresser. Ce qui a rendu difficile son organisation pratique avec pour conséquences la mauvaise circulation de l'information entre le bureau exécutif et les membres des groupements de base d'où une faible lisibilité des activités de l'Union. Toutefois, cette difficulté est en passe d'être résolue par le projet BKF/017 qui compte aider l'UNEAB à se doter d'un siège permanent.

## **II. LES GROUPEMENTS D'ELEVEURS D'AZAWAK**

### **1. Attribution, Financement, Actions et Gestion**

En rappel, les groupements d'éleveurs d'Azawak sont au nombre de 11. La liste comportant la date de création, le numéro de l'agrément et l'effectif de chaque groupement est jointe en annexe 2.

A l'image de l'UNEAB, les groupements ont été mis en place pour poursuivre des objectifs bien spécifiques et sont régis par des Statuts et un Règlement interne propre à chacun



d'eux. Chaque groupement dispose en son sein d'organes de gestion. Dans l'ensemble, les groupements s'engagent à :

- apporter leur caution morale à chacun de ses membres.
- sensibiliser et organiser ses membres pour le respect des engagements que chacun a pris à travers la signature du cahier des charges.
- mobiliser tous les adhérents en vue d'une exécution correcte des différentes activités du projet, surtout en matière de multiplication, de sélection et de diffusion du zébu Azawak, et en somme la mise en œuvre du schéma de reproduction.
- veiller à un emploi efficient des fonds de roulement et d'appui aux initiatives des producteurs mis en place par le projet, et au remboursement, dans les délais requis, des crédits contractés par chaque bénéficiaire.

Les sources de financement des groupements sont les droits d'adhésion et les cotisations de ses membres. Toutefois, les fonds rétrocédés à l'UNEAB les servent à divers niveaux : achat d'animaux, achat de SPAI et à l'appui aux initiatives en leur faveur sous forme de crédit et de subvention (Annexe 4).

Dans le cadre de la mise en œuvre du PSDZA II, plusieurs activités ont pu être menées à leur endroit. Il s'agit entre autres, de formations, de la mise en place d'unités économiques fonctionnelles (magasins de SPAI, trousseaux vétérinaires, atelier de blocs multi nutritionnel, etc.).

## **2. Analyse critiques du fonctionnement des groupements**

### **2.1. Instance de gouvernance**

A l'instar de l'UNEAB, chaque groupement a un organe dirigeant et un comité de contrôle mise en place de manière démocratique et ce, conformément aux Statuts et Règlement intérieur en vigueur. La structure organisationnelle de chaque groupement prévoit l'existence d'un certain nombre d'instances et d'organes tel que le recommande la loi 14, à savoir : l'assemblée générale (AG) ; le bureau exécutif ; le comité de contrôle et les comités spécifiques. En effet, les comités spécifiques sont créés en fonction des besoins de chaque groupement. Ils permettent de responsabiliser le maximum de membres de l'organisation et amener ainsi chacun à s'impliquer davantage dans les activités menées.

Le renouvellement de l'organe dirigeant est effectif dans tous les 11 groupements, cependant, la durée des mandats déborde par endroit (Annexe 3). La fréquence des réunions est consignée dans le règlement intérieur de chaque groupement. Il s'agit des rencontres statutaires comme les assemblées générales (1 à 3 par an selon les groupements) et des rencontres extraordinaires. Toutefois, la tenue des rencontres est moyennement respectée. En rappel, ces réunions servaient de cadres d'échanges d'informations entre les membres, et entre le groupement et les agents d'encadrement du PSDZA qui, à leur tour, servaient de relais pour la direction du projet. Les échanges portaient principalement sur les activités liées à l'amélioration génétique, le recouvrement des crédits, la vie des groupements, et des divers.

En ce qui concerne la prise en compte du genre, les femmes représentaient 21% des éleveurs membres des groupements. Ce taux variait selon les groupements. Hormis le groupement de Arbinda qui ne compte aucune femme, tous les autres groupements ont en leur sein des femmes. Elles participent à tous les niveaux de décision (bureaux des groupements, comités spécifiques et assemblées générales) ; En tenant compte de leur nombre par groupement, elles sont bien représentées dans les instances décisionnelles de plusieurs groupements sauf Taparko et Yalgo.

Quant à l'évolution des effectifs des membres par groupement, elle s'est faite en dent de scie dans la majeure partie des groupements. Les baisses constatées sont le plus souvent liées à des décès.



## **2.2. Activités et gestion des biens des groupements**

Outre la mobilisation d'un fonds de roulement pour l'achat du bétail et des intrants, d'un montant de plus de 80 millions, le PSDZA II a mis en place une série de petits fonds d'environ (sous forme de subventions) pour soutenir l'amélioration des conditions d'élevage chez les éleveurs encadrés. Ces fonds sont rassemblés sous le vocable « *Fonds d'appui aux initiatives des producteurs (FAIP)* » dont la valeur monétaire est estimée à 60 352 093 FCFA (Annexe 4). Pour leur déblocage, les éleveurs élaborent des microprojets individuels ou communautaires. Les apports de l'éleveur étaient estimés à près de 70% du budget, tandis que le projet fournissait les 30% restants. Ce sont les groupements qui étaient chargés du suivi des réalisations des microprojets individuels. Cette manière de gérer les infrastructures communautaires permet de mieux responsabiliser les communautés à la base. Le projet BKF/017 pourra s'appuyer sur ce dispositif pour consolider les acquis. Cependant, l'implantation de certaines infrastructures notamment les magasins est à revoir

Le trésorier et son suppléant ont la charge de la gestion financière des fonds mobilisés. Le niveau de mobilisation des cotisations varie d'un groupement à l'autre (Annexe 3). Dans l'ensemble, elle était supérieure à 50% de 2007 à 2008. Mais depuis la fin du projet en 2008, le niveau de cotisation a beaucoup baissé. Cela suscite des interrogations quant à la viabilité de ces groupements après les interventions. Les projets semblent être des stimulants. Or l'objectif à moyen et long terme pour ces groupements, est d'acquérir une autonomie technique et financière.

### **LECONS TIREES**

La mise en relation des caractéristiques de chaque groupement avec les critères d'appréciation du processus d'acquisition de l'autonomie fonctionnelle et financière montre que ni l'UNEAB, ni les groupements n'ont atteint le degré d'autonomie souhaité. Un travail conséquent doit être toujours mené pour le renforcement de la structuration des organisations existantes et surtout de l'UNEAB qui est la structure répondeuse afin qu'elle acquière une autonomie technique et financière. Partant de là, les groupements individuels pourraient bénéficier des appuis multiformes des partenaires.



## **2<sup>e</sup> PARTIE : LES ACTIONS DE RENFORCEMENT DES CAPACITES MENEES PAR LE PSDZA II**



## **I. FORMATIONS ET VOYAGES D'ETUDES**

Au cours de la période d'exécution du PSDZA II, plusieurs formations et voyages d'étude ont été effectués en faveurs de l'UNEAB et des Groupements d'éleveurs d'Azawak. La situation se présente comme suit :

### **❖ Au profit des Groupements d'éleveurs d'Azawak**

#### **1. Thèmes des formations dispensées aux groupements :**

- Formation des alphabétiseurs ;
- Alphabétisation des éleveurs et de leurs actifs ;
- Comptabilité et gestion des unités économiques ;
- Orientation stratégique et élaboration des programmes d'activités triennaux des groupements ;
- Elaboration de microprojets et techniques de négociation, commercialisation / marketing ;
- Organisation et fonctionnement des organisations paysannes ;
- Mandat, préparation et tenue d'une assemblée générale ;
- Techniques de rationnement des bovins ;
- Auxiliaires d'élevage ;
- Production de blocs MN ;
- Construction d'infrastructures (fenils et étables).

#### **2. Voyages d'études réalisés au profit des groupements :**

- Visites de réalisations (unités de testage d'Abalak et de Minimini, station de Toukounous, ...) et échanges d'expériences ;
- Visites et entretiens sur les infrastructures d'élevage, la conduite des troupeaux, la gestion de la reproduction, les mini laiteries, les élevages laitiers, le fonctionnement des groupements membres de l'UNEAB.

### **❖ Au profit de l'UNEAB**

- Textes législatifs et réglementaires, gestion financière et comptable des biens et des activités, manuel de procédures administratives et financières de gestion des fonds.

## **II. EVALUATION DES FORMATIONS ET VOYAGES D'ETUDES**

### **1. Les critères d'évaluation**

Quatre principaux critères ont été utilisés pour l'évaluation des différentes formations et des voyages d'études. Il s'agit de : La **pertinence** ; l'**assimilation** par les apprenants ; l'**application** et l'**impact**.

Les principaux résultats obtenus après une analyse des données collectées sont présentés dans le tableau ci-dessous.

Tableau récapitulatif de l'évaluation des formations et voyages d'études



| Thèmes de formations                                                                                                                                                                                               | Pertinence | Assimilation | Application | Impact |
|--------------------------------------------------------------------------------------------------------------------------------------------------------------------------------------------------------------------|------------|--------------|-------------|--------|
| Formation des alphabétiseurs et alphabétisation des éleveurs et de leurs actifs                                                                                                                                    |            |              |             |        |
| Comptabilité et gestion des unités économiques                                                                                                                                                                     |            |              |             |        |
| Orientation stratégique et élaboration des programmes d'activités triennaux des groupements                                                                                                                        |            |              |             |        |
| Elaboration de microprojets et techniques de négociation, commercialisation / marketing                                                                                                                            |            |              |             |        |
| Organisation et fonctionnement des organisations paysannes                                                                                                                                                         |            |              |             |        |
| Techniques de rationnement des bovins                                                                                                                                                                              |            |              |             |        |
| Auxiliaires d'élevage                                                                                                                                                                                              |            |              |             |        |
| Production de blocs MN                                                                                                                                                                                             |            |              |             |        |
| Construction d'infrastructures (fenils et étables)                                                                                                                                                                 |            |              |             |        |
| Visites de réalisation                                                                                                                                                                                             |            |              |             |        |
| Visites et entretiens sur les infrastructures d'élevage, la conduite des troupeaux, la gestion de la reproduction, les mini laiteries, les élevages laitiers, le fonctionnement des groupements membres de l'UNEAB |            |              |             |        |
| Textes législatifs et réglementaires, gestion financière et comptable des biens et des activités, manuel de procédures administratives et financières de gestion des fonds (UNEAB)                                 |            |              |             |        |

\* NB : Couleur verte : Bonne ; Couleur jaune : Moyenne ; Couleur rouge : Mauvaise

## 2. Analyse critique des formations et voyages d'études effectuées

Partant du tableau, les conclusions suivantes peuvent être tirées :

- Formation des alphabétiseurs et alphabétisation des éleveurs et de leurs actifs

L'alphabétisation est un long processus d'apprentissage. Elle demande une disponibilité des apprenantes sur plusieurs semaines voire plusieurs mois. Ce qui n'est pas évident pour le cas du public cible. Certes, des résultats satisfaisants ont été notés dans l'évaluation mais l'utilisation des acquis de l'alphabétisation dans les autres formations est discutable. La preuve en est qu'au niveau du groupement de Taparko, il y a une grande difficulté pour ses membres à suivre et à appliquer les formations techniques, à cause du taux d'analphabétisme élevé. Cela amène à avancer l'hypothèse selon laquelle, les autres groupements avaient en leur sein des membres instruits et l'alphabétisation leur a permis de se recycler.

De ce qui précède, l'alphabétisation n'est pas opportune pour cette phase du projet car l'impact reste faible sur le déroulement des actions à mener. Toutefois, il serait souhaitable d'avoir des membres instruits dans les bureaux que viendront à mettre en place par les groupements.

### ☉ Comptabilité et gestion des unités économiques

Le thème lié à la comptabilité et la gestion des unités économique requière un niveau d'instruction assez élevé pour son application réelle sur le terrain. Ce qui n'est pas le cas chez la plupart des groupements bénéficiaires de la formation, en témoigne le faible niveau d'application et par ricochet un faible impact.

Certes, la pertinence du thème pour les groupements n'est plus à démontrer, toutefois si le thème doit être reconduit, il faudra repenser l'approche. A savoir cibler les membres du bureau susceptibles de bien assimiler la formation et non de l'administrer à tout le monde. Par ailleurs, insister sur les cas pratiques et évaluer la gestion des unités dans les fiches de suivi.

### ☉ Orientation stratégique et élaboration des programmes d'activités triennaux des groupements

Définir des orientations stratégiques pour un groupement n'est pas toujours aisé, surtout si le niveau d'instruction n'est pas élevé. Néanmoins, toute organisation doit avoir une vision claire de son existence et définir des actions précises dans le temps. Conscient de cela, le thème de la formation ci-dessus cité est pertinent. Toutefois, les entravent à son assimilation



et son application demeurent au sein des groupements. A l'instar du thème précédent, il faudra définir des méthodes mieux adaptées au public cible.

Sachant bien que c'est un exercice collégial, cette formation pourrait être reprise dans l'ensemble des noyaux du projet. Mais l'approche doit changer et surtout insister sur l'essentiel pour une meilleure compréhension du thème.

#### ☉ Elaboration de microprojets et techniques de négociation, commercialisation / marketing

Le financement effectif des microprojets élaborés par un groupement constitue la sève nourricière de ses activités. Il est donc opportun pour ces derniers, d'avoir les connaissances nécessaires à l'élaboration de ces documents. Mais compte tenue de la complexité du thème qui nécessite un niveau élevé d'instruction, la majeure partie des groupements bénéficiant de la formation n'ont pas pu la valoriser conséquemment. Pour la présente phase du projet, il serait indiqué de ramener cette formation au niveau de l'UNEAB qui regroupe les principaux leaders des groupements. Cela leur permettra de mieux assimiler le thème et de s'entraider pour monter des dossiers pertinents.

#### ☉ Organisation et fonctionnement des organisations paysannes

Le socle d'une organisation paysanne est la connaissance de ses normes par ses membres. Donc ce thème est très pertinent pour les groupements encadrés par le projet. L'évaluation indique que Malgré la bonne assimilation du thème, l'application du thème est moyenne pour l'ensemble des groupements car il existe toujours des dysfonctionnements au sein de ces derniers. Néanmoins l'impact est positif compte tenu des changements opérés dans la structuration et la vie des groupements. Afin de maintenir cette dynamique, un recyclage permettra d'aplanir les difficultés toujours persistantes.

#### ☉ Techniques de rationnement des bovins

Cette formation a été organisée à Ziniaré où l'étude n'a pas encore été conduite.

#### ☉ Auxiliaires d'élevage

Rapprocher les services et produits vétérinaires auprès des producteurs qui en ont le plus besoin, est un vœu ardent du département en charge des ressources animales. C'est dans cette optique que des initiatives se développent par endroit pour l'atteinte de cet objectif. Cependant, ces initiatives vont souvent en l'encontre des textes existants. L'exercice de la profession vétérinaire est régi par des autorisations délivrées par l'autorité vétérinaire.

Certes le thème est très sollicité mais son application demeure faible. Si le thème devrait être reconduit, il serait nécessaire d'associer la Direction Générale des Services Vétérinaires qui précisera la conduite à tenir et les modalités pratiques pour l'utilisation des produits vétérinaires même si ces produits ne sont destinés qu'aux soins de premières nécessités. Mais aussi, une clarification de la volonté des groupements à maintenir ou pas les trousses vétérinaire et à mieux suivre les activités des auxiliaires formés.

#### ☉ Production de blocs Multi nutritionnel

Le thème lié à la production est jugé pertinent mais confronté à des difficultés de mise en œuvre à cause. Ce qui justifie la faible application du thème. L'acquisition de matériel et certains inputs restent difficiles. Pour la reconduction du thème, une étude de faisabilité serait indiquée, et les groupements retenus devraient être appuyés comme le préconise le projet BKF/017.

#### ☉ Construction d'infrastructures (fenils et étables)

La construction d'infrastructures d'accompagnement de l'élevage de bovin est bien perçue par les producteurs car il apprécie à sa juste valeur à travers notamment la création des conditions pour une meilleure alimentation des animaux et un cadre de vie plus décent, favorisant ainsi une meilleure production. Le thème ainsi dispensé a reçu un écho très favorable au sein du public cible et il est appliqué même après la fin du PSDZA. Son recyclage n'est pas nécessaire. Mais cette formation pourra être reconduite dans les nouveaux noyaux du projet BKF/017.



- ☉ Textes législatifs et réglementaires, gestion financière et comptable des biens et des activités, manuel de procédures administratives et financières de gestion des fonds

Destinée aux responsables de l'UNEAB, cette formation est jugée pertinente mais son application n'est pas effective. Mais dans le cadre du projet BKF/017, un rappel sur les principales dispositions du manuel de procédures sera nécessaire lors d'une réunion du Bureau Exécutif de l'UNEAB. Les aspects liés aux textes législatifs et à la gestion pourront être pris en compte dans les recyclages souhaités plus haut.

- ☉ Visites de réalisation et d'échange

Les différentes visites réalisées ont été très bénéfiques pour les producteurs car c'est la capacité visuelle et l'écoute qui prime. Elles permettent d'atteindre plus rapidement les objectifs escomptés que les formations classiques et les sensibilisations. Dans ces conditions l'écho est plus perceptible. Plusieurs d'entre eux se sont inspirés des enseignements de ces visites. Les visites de réalisations et d'échanges doivent être une des priorités du projet BKF/017.

### **LECONS TIREES**

Le fonctionnement des groupements d'éleveurs d'Azawak et de l'UNEAB constitue un apprentissage de la bonne gouvernance au niveau des communautés de base. Les formations dispensées par le projet contribuent à renforcer leurs capacités techniques et organisationnelles. A cet effet, les formations initialement dispensées doivent être revues dans la forme que dans le fond. La plupart des formations n'étaient par opportunes pour le public cible car requérant un niveau d'instruction non négligeable. Ce qui a entraîné un taux d'application global faible. Il faudra s'en tenir à l'essentiel pour la conduite des activités.



### **3<sup>e</sup> PARTIE : LES UNITES ECONOMIQUES FONCTIONNELLES MISES EN PLACE**



Dans le cadre de l'amélioration des conditions d'élevage pour une meilleure productivité et une meilleure valorisation du potentiel génétique des animaux, le PSDZA II a encouragé la mise en place d'unités économiques fonctionnelles communautaires (magasins de SPAI, trousse vétérinaires, ateliers de blocs multi nutritionnel) et le financement de microprojets individuelles (Etables, fenil, matériels d'élevage). Ces actions ont beaucoup contribué à l'alimentation, aux soins et à diversifier les sources de revenus des groupements. Quelles analyses peut-on faire de ces unités économiques fonctionnelles mises en place et de ces microprojets individuels ?

## **I. MAGASINS DE SPAI**

Dix (10) magasins ont pu être construits au profit des groupements d'éleveurs d'Azawak. Seul le groupement de Ouagadougou ne dispose pas de son magasin à cause de la difficulté d'acquisition de terrain et de la dispersion de ses membres. Ces magasins, souvent annexé d'un petit local permet au groupement de stocker les SPAI et autres produits.

Suite à une mission pour l'établissement de la situation de référence des indicateurs du projet BKF/017 en mai 2011, il ressortait que tous les magasins construits présentent des anomalies engendrées par des fissures des murs et des terrasses, perforation de la toiture, etc. En somme, un manque accru d'entretien de la part des bénéficiaires, manifesté par une présence renforcée de termites détruisant la quasi-totalité des palettes.

Face à ces constats, il est impérieux d'inculquer aux groupements le sens de la gestion et de l'entretien des biens communautaires. A ce sujet, les cahiers de charges qui seront élaborés doivent tenir compte de ces notions très essentielles pour les pérennisations des acquis.

Fort heureusement que des actions seront entreprises pour la réparation de ses magasins dans le cadre du projet BFK/017.

## **II. ATELIERS DE PRODUCTION DE BLOCS MULTI NUTRITIONNELS**

Dans le but d'améliorer la valorisation du fourrage grossier dans l'alimentation des animaux en saison sèche, le PSDZA II a formé les groupements à la fabrication des blocs multi nutritionnels. Deux groupements (Ziniaré, Dori) se sont portés volontiers pour leur fabrication à grande échelle et ont reçu à cet effet, du matériel de production (Tableau suivant) et un fonds d'appui d'une valeur de 250 000 FCFA chacun composé comme suit : 200 000 FCFA pour achat d'ingrédient de départ et 50 000 FCFA pour la confection de hangar et de claie pour le séchage des blocs.

Matériel reçu pour la fabrique des BMN :

| Désignation                                             | Quantité |
|---------------------------------------------------------|----------|
| Moule métallique de 50 cm x 23 cm x 25 cm               | 01       |
| Moules cylindriques jumelés à pression de 22 cm x 17 cm | 01       |
| Moule cylindrique de 22 cm x 17 cm                      | 01       |
| Demi-fûts coupés en longueur                            | 02       |
| Pelles                                                  | 04       |
| Spatules en bois                                        | 04       |
| Seaux de 20 litres en plastique                         | 02       |
| Seaux de 10 litres en plastique                         | 04       |
| Peson de 25 kg                                          | 01       |
| Paire de gants en plastique                             | 02       |
| Gobelet gradué de 01 litre                              | 01       |
| Grillage (rouleau de 25 m et 02 m de haut)              | 01       |
| Brouette                                                | 01       |

Dans l'ensemble, les produits sont bien appréciés par les éleveurs en témoigne la forte demande. La technologie est bien maîtrisée aux seins des groupements qui en produisent. L'activité est semble-t il rentable (Annexe 5) et pourrait être plus rentable si la mélasse est



substituée par un autre ingrédient moins cher. Cependant, la faible capacité d'approvisionnement en ingrédients (mélasse) ne permet pas de satisfaire la demande. A ce sujet, des dispositions doivent être prise par les groupements pour s'approvisionner en temps opportun (disponibilité des ingrédients, à bas prix). D'ailleurs, des modules de formations ont été dispensés à cet effet. Mais le manque de local spécifique pour loger l'atelier de fabrique et la production manuelle des blocs rend pénible le travail, une construction de local adapté et une mécanisation même partielle rendra l'activité attractive et augmentera la production.

Les fonds de roulement alloués à cet effet sont actuellement mal utilisés voire dilapidés. Pour une meilleure gestion des ateliers de production des blocs multi nutritionnels, il serait souhaitable qu'ils soient confiées (sous forme de location) à des personnes susceptibles (membre des groupements ou non) de mieux les valoriser et faire profiter au mieux les groupements car la gestion actuelle présente un désintéressement de certains responsable et membres des groupements.

Si la mécanisation des unités de productions se réalise, une spatialisation judicieuse de ces unités est requise sur l'ensemble de la zone d'intervention du projet BKF/017, à savoir 5 ateliers repartis dans les noyaux de Ziniaré, Dori, Djibo, Ouahigouya et Koudougou. La relecture de la formule permettra l'introduction d'autres ingrédients beaucoup plus disponibles.

### III. TROUSSES VETERINAIRES

La mise à disposition des trousse vétérinaires auprès des groupements avait pour ambition de contribuer efficacement à l'administration de petits soins aux animaux. Deux auxiliaires avaient été formés en partenariat avec la Direction Générale des Services Vétérinaires. Afin de mieux exécuter leur mission, une trousse vétérinaire d'une valeur de 264 073 FCFA et deux (2) vélos ont été octroyés à chacun des groupements. Cette trousse devant fonctionner sous forme d'un fonds de roulement. Cependant, l'objectif souhaité semble ne pas être atteint. Aucune trousse n'est fonctionnelle présentement et pire les vélos sont introuvables. Vraisemblablement, la reconduction de cette action est peu pertinence pour la phase actuelle du projet.

### IV INFRASTRUCTURES D'ELEVAGE INDIVIDUELLES

Le PSDZA a permis la mise en place de plusieurs infrastructures d'élevage individuelles (fenils, étables, aires de traite) et l'achat de matériel d'élevage (charrettes, brouettes, faux, faucilles, fourches, moules, etc.) dont le détail se trouve en annexe 4. La construction de ces infrastructures était jugée très pertinente, mais quelques années plus tard, le constat semble décevant notamment pour ce qui est des fenils et des étables (Tableau).

Tableau : Synthèse des données collectées sur les élevages

| Noyaux       | Nombre d'éleveurs possédant 1 étable | Nombre d'éleveurs possédant 1 fenil |
|--------------|--------------------------------------|-------------------------------------|
|              | Situation actuelle                   | Situation actuelle                  |
| Ouagadougou  | 11                                   | 9                                   |
| Ziniaré      | 10                                   | 5                                   |
| Dori         | 1                                    | 4                                   |
| Gorom-Gorom  | 0                                    | 5                                   |
| Bani         | 0                                    | 3                                   |
| Yalgo        | 8                                    | 7                                   |
| Taparko      | 0                                    | 2                                   |
| Djibo        | 8                                    | 11                                  |
| Pobé-Mengao  | 6                                    | 8                                   |
| Kelbo        | 8                                    | 4                                   |
| Arbinda      | 7                                    | 9                                   |
| <b>TOTAL</b> | <b>48</b>                            | <b>58</b>                           |

Partant du tableau, 17% des éleveurs possèdent un fenil actuellement contre 75% en 2007 (rapport final PSDZA II, 2008). Quant aux étables, les taux sont respectivement de 14%



actuellement contre 42% en 2007 selon la même source. On constate une forte baisse des différents taux liée au fait que la plupart des infrastructures étaient en matériaux locaux et n'ont pas résisté aux inondations survenues dans certains noyaux comme Yalgo et Taparko.

Les questions récurrentes à ce sujet sont les suivantes ? Pourquoi apporter des financements à des infrastructures éphémères si l'objectif est d'évoluer vers le professionnalisme ? Est-ce nécessaire de conduire ces genres d'opérations pour cette phase du projet ?

A ces questions ? Les réponses à apporter pourraient être abstraites. Mais une réflexion plus poussées contribuera à solutionner cette problématique.

### **LECONS TIREES**

Les anomalies constatées sur les magasins construits au profit des groupements n'est vraisemblablement pas liées au manque d'entretien uniquement, la mauvaise qualité des matériaux utilisés pourrait aussi justifier cet état de fait.

L'implantation des unités de fabrication des blocs multi nutritionnels nécessite une étude de faisabilité qui permettra de rentabiliser l'opération à court et moyen terme.

La pertinence de la gestion des trousseaux de discussion est toujours discutable. Etant donné que chaque groupement est suivi par un agent commis à la tâche, il serait souhaitable de renforcer plutôt le plateau technique de ces derniers afin qu'ils puissent mener à bien l'activité de santé animale auprès des groupements encadrés.

Pour la construction d'infrastructures d'élevage individuelles, la définition claire d'un cahier de charge est nécessaire pour éviter leur destruction rapide. Une attention particulière doit être portée sur la qualité des matériaux à utiliser.



## **4<sup>e</sup> PARTIE : ACTIONS D'AMELIORATION GENETIQUE**



## I. SCHEMA DE SELECTION

Au cours de l'exécution du PSDZA II, un schéma d'amélioration génétique a été mis en œuvre dans le but de mettre en place un processus durable d'amélioration génétique du cheptel. Ce processus commence par l'identification des animaux encadrés, le suivi de la généalogie, le contrôle des performances individuelles, l'évaluation génétique, le choix des géniteurs selon les lignées maternelles (vaches bonnes laitières) et la confirmation des taureaux par la valeur génétique de la descendance (Rapport final PSDZA II, 2008).

Tout éleveur qui désirait participer aux activités du PSDZA devrait :

- Adhérer au Groupement des éleveurs d'Azawak du noyau où se trouve son élevage.
- Choisir dans son troupeau bovin (Azawak ou autres races locales) un certain nombre de têtes selon ses capacités d'entretien pour constituer le programme ou en acquérir à cet effet ;
- Souscrire à l'une ou aux deux formes de multiplication du zébu Azawak préconisées par le projet : l'élevage de l'Azawak en race pure et le croisement d'absorption d'autres races locales par le zébu Azawak ;
- Respecter les modalités de mise en œuvre des fonds de roulement (bétail et aliments) et des fonds d'appui aux initiatives des producteurs.
- Accepter l'enregistrement et le bouclage des animaux concernés par le programme ;
- Ne pas sortir un animal bouclé et enregistré sans en informer au préalable l'agent chargé du suivi d'où il relève ;
- Suivre les protocoles de gardiennage, de santé animale et d'alimentation recommandés pour les animaux soumis au programme ;
- Sédentariser les animaux du programme ; en cas de nécessité absolue, une petite transhumance (dans un rayon de 20 km) est autorisée à condition que l'agent soit informée à tout moment de la localisation exacte des animaux et que la rigueur d'isolement des troupeaux soit respectée pendant la transhumance ;
- Constituer de réserves fourragères de bonne qualité pour améliorer l'alimentation des animaux en saison sèche ;
- Vacciner et déparasiter des animaux du programme selon un calendrier établi de commun accord avec les agents;
- Suivre le schéma de reproduction établi par le Projet :
  - \*Aucun géniteur mâle autre que de race Azawak pure n'est admis pour la reproduction ;
  - \*Les métis mâles issus du croisement Azawak x race locale seront retirés du troupeau du programme ou castrés avant l'âge maximal de deux (02) ans ;
  - \*La consanguinité sera minimisée par le retrait du géniteur en cause du troupeau dans lequel le risque est prouvé.
- Accepter et faciliter toutes les opérations de suivi des performances des animaux par les agents du projet :
  - \*Pesées de certaines catégories d'animaux à des moments définis ;
  - \*Contrôle laitier ;
  - \*Inventaire du troupeau ou toute autre activité jugée nécessaire ;
- Enregistrer tout événement lié à la dynamique des troupeaux (entrées et sorties), tenir à jour son carnet ;
- Participer aux formations techniques qui viendraient à être identifiées comme pouvant aider à l'amélioration de la productivité de ses animaux et les mettre en pratique.



## II. ELEVEURS SELECTIONNEURS : Résultats ; nombre d'animaux sélectionnés

Après l'exécution du PSDZA II, deux résultats attendus n'ont pas été atteints :

- le rapport de formulation prévoyait aussi le recrutement de trente (30) éleveurs sélectionneurs. Mais dans sa mise en œuvre, le projet a opté de considérer tous les éleveurs comme étant potentiellement sélectionneurs car possédant encore de faibles effectifs en Azawak ; c'est plus tard, au fur et à mesure que les effectifs s'accroîtront, qu'émergeront les éleveurs sélectionneurs. Cette vision a aussi été confirmée par une étude de l'INERA qui a montré qu'à ce stade, tous les éleveurs encadrés étaient encore homogènes aux points de vue structure des troupeaux et fonctionnement des élevages ;
- il était prévu l'érection de deux unités de testage (à Loumbila et à Sambonanye), mais seule celle de Loumbila a été opérationnelle. En effet, il s'est avéré que le budget prévu ne pouvait pas couvrir les deux unités. Le projet a donc concentré ses efforts sur la réussite du fonctionnement du testage à Loumbila.

Une unité d'évaluation génétique de taurillons issus de bonnes vaches laitières était donc opérationnelle depuis septembre 2005 à la station de Loumbila sous le contrôle du CMAP. La première cohorte de 40 taurillons a séjourné dans cette unité de septembre 2005 à avril 2007 ; après évaluation, 25 taurillons ont été achetés par les éleveurs encadrés, 4 ont été remis aux éleveurs lauréats du Concours Meilleur Eleveur d'Azawak édition 2007, 7 ont été diffusés hors programme et 4 ont été réformés pour divers défauts de conformation ou de maladie. Ceci dit, 36 taurillons sélectionnés et classés ont été réintroduits dans les élevages à la base pour carrière.

En rappel, le recrutement des taurillons s'est fait sur la base de la production laitière des mères; si l'animal correspond aux standards de la race, il est retenu pour le testage. Le niveau de production laitière de la mère est un paramètre qui intervient dans le classement final des taurillons; il sera augmenté progressivement pour le choix des futurs taurillons en testage.

Le coût de fonctionnement de l'Unité de testage s'est révélé trop cher et peu réaliste. En effet, sur les 18 mois qu'a duré le séjour des taurillons à la station de Loumbila, le devis-programme exige une contribution du projet de plus de 400.000 FCFA par animal, soit près de 750 FCFA par jour. Il est aisé de conclure que dès la fin du projet, les éleveurs à travers leur Union ne pouvaient pas supporter de tels coûts pour une telle opération. Donc, il faudrait réorienter le testage des taurillons vers d'autres formes plus appropriées notamment une évaluation génétique dans les fermes d'origine comme relevé par la mission d'évaluation finale du PSDZA II.

## III. EVOLUTION DES PARAMETRES ZOOTECHNIQUES

Selon le rapport final d'évaluation du PSDZA II, *« les résultats sur les paramètres zootechniques indiquent un accroissement annuel moyen de la fécondité de 12 % et de la productivité numérique de 21 %, entre 2004 et 2007. Ce qui traduit une amélioration dans la maîtrise par les éleveurs de la reproduction et de la survie des jeunes avec la mise en œuvre des actions d'encadrement.*

*En matière de croisement, il ressort des résultats qu'il y a eu en moyenne une baisse de 5 % par an de la proportion du zébu Peul pur sang dans la composition des troupeaux noyaux.*

*Au niveau des veaux nés, on note un taux de progression annuelle de réussite dans les croisements d'absorption d'environ 12 %. Un accroissement annuel moyen de 25 % des effectifs des produits nés avec du sang Azawak a été relevé pour l'ensemble des trois zones d'encadrement. Ce qui devrait permettre d'asseoir par la suite un programme de sélection à la base au niveau de ces élevages ».*



#### IV. EVOLUTION DU CHEPTTEL

Au cours de la seconde phase du PSDZA, une mission de prospection et d'achat du bétail a eu lieu au Niger en 2004. Elle a permis d'acquérir 234 femelles et 168 mâles. Aussi des transfères internes de géniteurs entre éleveurs ont été effectués, soit pour éviter la consanguinité soit dans le cadre de vente de taurillons issus de vaches de bonne valeur génétique.

En fin décembre 2007, marquant l'inventaire final du cheptel avant la clôture du PSDZA II, les effectifs du bétail encadré atteignent 4770 têtes. De cet effectif, la situation comparée des géniteurs et des FAR se présente comme suit :

| Noyaux       | Situation des géniteurs et des FAR dans les noyaux |                   |                    |                   |
|--------------|----------------------------------------------------|-------------------|--------------------|-------------------|
|              | Nombre de géniteurs                                |                   | Nombre de FAR      |                   |
|              | Situation mai 2011                                 | Situation en 2008 | Situation mai 2011 | Situation en 2008 |
| Ouagadougou  | 8                                                  | 11                | 236                | 103               |
| Ziniaré      | 4                                                  | 08                | 289                | 112               |
| Dori         | 4                                                  | 9                 | 151                | 99                |
| Gorom-Gorom  | 6                                                  | 7                 | 248                | 112               |
| Bani         | 4                                                  | 6                 | 218                | 59                |
| Yalgo        | 9                                                  | 13                | 244                | 116               |
| Taparko      | 5                                                  | 10                | 175                | 75                |
| Djibo        | 15                                                 | 27                | 508                | 391               |
| Pobé-Mengao  | 4                                                  | 10                | 274                | 301               |
| Kelbo        | 0                                                  | 6                 | 120                | 138               |
| Arbinda      | 6                                                  | 6                 | 254                | 109               |
| <b>TOTAL</b> | <b>65</b>                                          | <b>113</b>        | <b>2717</b>        | <b>1413</b>       |

Il est constaté une forte déperdition de géniteurs entre 2008 et la situation actuelle. Le nombre de géniteur passe en effet de 113 à 65 et le noyau de Kelbo en est totalement dépourvu. En réalité, il ne reste plus que 32 bons géniteurs, car 33 géniteurs sont à changer pour éviter la consanguinité. Ainsi donc, le ratio actuel est d'environ 1 géniteur pour 85 FAR contre 1 géniteur pour 13 FAR en 2008.

#### LECONS TIREES

L'intervention du PSDZA pour un processus durable d'amélioration génétique du cheptel s'est effectuée à plusieurs niveaux. La définition claire d'un schéma d'amélioration génétique. A ce niveau, la prise en compte des femelles Azawak pourrait faire régresser l'amélioration génétique souhaitée. Ces femelles achetées ne proviennent pas d'une unité de sélection mais de troupeaux d'éleveurs. Or ces derniers vendent très rarement les meilleures vaches. L'amélioration génétique notifiée pourrait être discutable si certains paramètres sont pris en compte.

Les critères de sélection des géniteurs ont été bien définis. Ils étaient basés surtout sur l'observation. Était-il nécessaire de transférer les veaux dans une unité de testage à ce stade ? La preuve en est que le coût de revient des animaux sélectionnés était hors de portée. Il serait opportun en accord avec la vision du PSDZA que les futures sélections se fassent au sein des noyaux.

Le problème majeur repose sur l'évolution du cheptel Azawak introduit. Contrairement aux attentes, le nombre de géniteurs a beaucoup diminué même avant la fin du projet. Ce qui suscite des interrogations. Les géniteurs ne sont-ils pas embouchés et vendus ? Est-ce une forte mortalité ? L'objectif visé n'était-il pas détourné pour d'autres fins ?

Force est de souligner qu'avec la clôture du PSDZA II, le schéma de sélection est à l'arrêt. Très rare de producteurs ont continué à remplir le carnet de l'éleveur mis à leur disposition. D'où la question du bien fondé de ce carnet hors programme. Quel bilan pourra être établi par rapport à la qualité des carnets remplis ?



Pour promouvoir une amélioration génétique véritable et durable, toutes ces questions méritent des réponses ainsi que des solutions appropriées.

## **CONCLUSION GENERALE**

En s'inspirant du rapport final du PSDZA II, il ressort que depuis la première phase, du PSDZA, beaucoup de leçons peuvent être tirées de l'expérience du projet.

De par sa démarche participative, le projet a su favoriser l'émergence de groupements d'éleveurs, qui de nos ont évolué en une faïtière nationale. Ce qui laisse dire, qu'ils tendent vers la voie d'une autonomie d'action. Cette organisation et son processus de maturation constituent des gages pour toute intervention future.

Les différents appuis apportés par le PSDZA aux groupements leur ont permis de prendre leur destin en mains à travers les différentes formations reçues, les fonds de roulement ainsi que des subventions octroyés. Certes, il y a des actions que sont mises en cause mais dans la plupart des cas, l'intervention du projet a été salubre et a participé à l'émergence d'une frange de la population souvent marginalisé par l'aide au développement.

Aujourd'hui, affirmer –t- on qu'au niveau des groupes cibles, une conscience est créée et des réflexes professionnels se mettent progressivement en place pour améliorer sa production ainsi que la participation à la mise en place d'outils relativement modernes de conduite de l'élevage. En outre, ces groupes amorcent une ouverture vers l'extérieur notamment le Niger dans le cadre de la recherche de géniteurs Azawak plus performants et d'échange d'expériences en élevage.

Etant donné que le PSDZA constituait un test, des activités mieux consolidées pourront émerger de cette expérience afin de booster le processus de l'amélioration génétique des bovins de race locale.



## **ANNEXES**



**Annexe 1 : Structure dirigeante de l'UNEAB**  
Bureau Exécutif de l'UNEAB

| N° | Postes                                               | Nom et Prénom(s)      | Groupements |
|----|------------------------------------------------------|-----------------------|-------------|
| 1  | Président                                            | NASSA Boureima Robert | Ziniaré     |
| 2  | Vice-Président                                       | DICKO Hanafi          | Dori        |
| 3  | Secrétaire Général                                   | ZONGO Boukaré         | Ouaga       |
| 4  | Secrétaire Générale Adjointe                         | RABO Foutouna         | Kelbo       |
| 5  | Trésorier Général                                    | DICKO Boubacari       | Djibo       |
| 6  | Trésorier Général Adjoint                            | Oumarou HAMIDOU       | Bani        |
| 7  | Secrétaire à l'Organisation                          | Haïbala OULD SIDI     | Gorom Gorom |
| 8  | 1 <sup>er</sup> Secrétaire Adjoint à l'Organisation  | MAÏGA Idrissa         | Aribinda    |
| 9  | 2 <sup>ème</sup> Secrétaire Adjoint à l'Organisation | YAMEOGO Bangba Saïdou | Taparko     |
| 10 | Responsable à l'Information                          | SEBGO Jean            | Yalgo       |
| 11 | Responsable Adjoint à l'Information                  | DICKO Minkailou       | Pobé Mengao |

**Comité de Contrôle de l'UNEAB**

| N° | Nom et Prénom(s)         | Groupements | Adresses                              |
|----|--------------------------|-------------|---------------------------------------|
| 1  | ZONGO Bernadette TAPSOBA | Ziniaré     | Tél. 76 56 96 58 Ziniaré / Oubritenga |
| 2  | SAWADOGO Fadima DIALLO   | Bani        | Tél. 40 46 76 14 Bani / Séno          |
| 3  | Roumar OULD SIDI         | Gorom Gorom | Tél. 70 34 26 89 Gorom / Oudalan      |

**Annexe 2 : Situation des groupements d'éleveurs d'Azawak membres de l'UNEAB**

| Localités        | Dénomination                                                  | Date de création | Membres    |           |            | N° et Date d'Agrément                                 |
|------------------|---------------------------------------------------------------|------------------|------------|-----------|------------|-------------------------------------------------------|
|                  |                                                               |                  | H          | F         | T          |                                                       |
| Aribinda         | A Nee Zonri (Les bovins choisis / sélectionnés)               | 20/03/2004       | 21         | 0         | 21         | 2005-002/MATD/RSHL/PSUM/DRBN du 02 décembre 2005      |
| Djibo            | Naayi Pinadi (Vaches avec antimoine / lunettes)               | 04/05/2001       | 49         | 06        | 55         | N°2001-00125/MATD/PSM/DJBO du 24 juillet 2001         |
| Kelbo            | Guulgue Yampala (Nouvelles techniques d'élevage)              | 20/05/2004       | 14         | 03        | 17         | 2005-042/MATD/RSHL/PSUM/DKLB du 24 octobre 2005       |
| Pobé Mengao      | Djam naati (La paix est venue)                                | 31/04/2005       | 20         | 02        | 22         | 2005-28/MATD/RSHL/PSUM/DPBM du 11 novembre 2005       |
| <i>S/T Djibo</i> | <i>04</i>                                                     | <i>-</i>         | <b>104</b> | <b>11</b> | <b>115</b> | <i>-</i>                                              |
| Bani             | Lobbo Boodedjo (Bovin rouge sélectionné)                      | 05/01/2005       | 21         | 05        | 26         | N°2005-002/MATD/PSNO/DBNI du 04 février 2005          |
| Dori             | Kossam Bodeeji (Lait de vaches rouges)                        | 24/04/2001       | 12         | 12        | 24         | 2001-006/MATD/ PSNO/DDOR du 13 juin 2001              |
| Gorom Gorom      | Attaram (Vaches venues du Nord)                               | 31/05/2004       | 22         | 10        | 32         | N°2004-010/MATD/PUDL/DGG du 15 juin 2004              |
| Taparko          | Hooli Bodédji (vaches rouges)                                 | 07/11/2004       | 16         | 02        | 18         | 2005-001 /MATD/RCN/ PNMT/DYLG/CYLG du 20 juillet 2005 |
| Yalgo            | Maaro Bodéyis (éleveurs de bovins rouges)                     | 24/08/2001       | 25         | 12        | 37         | 2001-030/MATD/ PNMT/DYLG du 29 octobre 2001           |
| <i>S/T Dori</i>  | <i>05</i>                                                     | <i>-</i>         | <b>96</b>  | <b>41</b> | <b>137</b> | <i>-</i>                                              |
| Ouaga            | Groupe des éleveurs sélectionneurs d'Azawak du Centre (GESAC) | 24/11/2001       | 21         | 17        | 38         | N°2002-0068/MATD/PKAD/HC/SG du 12 juillet 2002        |
| Ziniaré          | Groupe d'éleveurs d'Azawak Wend Kōnta                         | 30/07/2004       | 20         | 02        | 22         | 2005-07/MATD/POTG/ DZNR/P du 24 février 2005          |
| <i>S/T Ouaga</i> | <i>02</i>                                                     | <i>-</i>         | <b>41</b>  | <b>19</b> | <b>60</b>  | <i>-</i>                                              |
| <b>Total</b>     | <b>11</b>                                                     | <b>-</b>         | <b>241</b> | <b>71</b> | <b>312</b> | <b>-</b>                                              |

\*Situation faite en octobre 2010



**Annexe 3 : Situation organisationnelle des groupements d'éleveurs d'Azawak**

| Groupements | Date de création | Effectif |    | Bureau |   | Périodicité des AG | Périodicité réunion de bureau | Date du dernier renouvellement du bureau | Situation des cotisations |        |        |
|-------------|------------------|----------|----|--------|---|--------------------|-------------------------------|------------------------------------------|---------------------------|--------|--------|
|             |                  | H        | F  | H      | F |                    |                               |                                          | 2007                      | 2008   | 2009   |
| Arbinda     | 20/03/04         | 21       | 0  | 8      | 0 | Trimestriel        | Mensuelle                     | 13/06/2009                               | 100%                      | 100%   | 0%     |
| Djibo       | 04/05/2001       | 49       | 6  | 11     | 1 | Trimestriel        | Mensuelle                     | 19/04/2008                               | 56,25                     | 23,21% | 15,09% |
| Kelbo       | 20/05/2004       | 14       | 3  | 3      | 3 | Semestriel         | Mensuelle                     | 13/02/2008                               | 0%                        | 94,44  | 0%     |
| Pobé-Mengao | 31/04/2005       | 20       | 2  | 7      | 1 | Semestriel         | Mensuelle                     | 11/03/2008                               | 100%                      | 100%   | 100%   |
| Bani        | 05/01/2005       | 21       | 5  | 5      | 3 | Trimestriel        | Mensuelle                     | 18/10/2008                               | 100%                      | 100%   | 7,41%  |
| Dori        | 24/05/2001       | 12       | 12 | 4      | 3 | Semestriel         | Trimestriel                   | -                                        |                           |        |        |
| Gorom-Gorom | 31/05/2004       | 22       | 10 | 9      | 1 | 3 fois/an          | Mensuel                       | 23/12/2007                               | 100%                      | 100%   | 78,13% |
| Taparko     | 07/11/2004       | 16       | 2  | 6      | 2 | 3 fois/an          | Trimestre                     | 20/09/2008                               | 100%                      | 100%   | 100%   |
| Yalgo       | 24/08/2001       | 25       | 12 | 10     | 0 | 3 fois/an          | Trimestriel                   | 19/09/2008                               | 100%                      | 100%   | 54,05  |
| Ouagadougou | 24/11/2001       | 21       | 17 | 4      | 4 | Semestriel         | Trimestriel                   | 05/04/2008                               | 65%                       | 90%    | 48%    |
| Ziniaré     | 30/07/2004       | 20       | 02 | 3      | 1 | Semestriel         | mensuel                       | 09/08/2007                               | 39,13                     | 86,96% | 43,48% |



## Annexe 4 : Microprojets financés par le PSDZA II

\* dans la Zone de Djibo.

| Microprojets                               | Désignations            | Microprojets financés/Zone de Djibo |                       |                    |
|--------------------------------------------|-------------------------|-------------------------------------|-----------------------|--------------------|
|                                            |                         | Nombre                              | Coût unitaire en FCFA | Coût total en FCFA |
| Microprojets individuels                   | Fenils                  | 59                                  | 30 500                | 1 799 500          |
|                                            | Etables                 | 36                                  | 41 500                | 1 494 000          |
|                                            | Charrettes              | 51                                  | 45 000                | 2 295 000          |
|                                            | Brouettes               | 37                                  | 7 500                 | 277 500            |
|                                            | Faux                    | 20                                  | 10 500                | 210 000            |
|                                            | Faucilles               | 9                                   | 375                   | 3 375              |
|                                            | Fourches                | 20                                  | 750                   | 15 000             |
|                                            | Moules PAVE             | 10                                  | 4 500                 | 45 000             |
|                                            | Râteaux                 | 8                                   | 450                   | 3 600              |
|                                            | Bâches                  | 2                                   | 10 000                | 20 000             |
|                                            | Fûts                    | 6                                   | 5 000                 | 30 000             |
|                                            | Semences                | 7                                   | 2 675                 | 18 725             |
|                                            | <b>Total</b>            | <b>265</b>                          | <b>-</b>              | <b>6 211 700</b>   |
| Infrastructures communautaires             | Magasins (grand format) | 1                                   | 9 998 665             | 9 998 665          |
|                                            | Magasins (petit format) | 3                                   | 4 880 000             | 14 640 000         |
|                                            | <b>Total</b>            | <b>4</b>                            | <b>-</b>              | <b>24 638 665</b>  |
| <b>TOTAL GENERAL MICROPROJETS FINANCES</b> |                         | <b>269</b>                          | <b>-</b>              | <b>30 850 365</b>  |

\* dans la Zone de Dori.

| Microprojets                               | Désignations                | Microprojets financés/Zone de Dori |                       |                    |
|--------------------------------------------|-----------------------------|------------------------------------|-----------------------|--------------------|
|                                            |                             | Nombre                             | Coût unitaire en FCFA | Coût total en FCFA |
| Microprojets individuels                   | Fenils                      | 47                                 | 30 300                | 1 424 100          |
|                                            | Etables                     | 28                                 | 41 666                | 1 166 648          |
|                                            | Moules PAVE GM              | 20                                 | 4 500                 | 90 000             |
|                                            | Moules PAVE PM              | 23                                 | 3 750                 | 86 250             |
|                                            | Râteaux                     | 39                                 | 450                   | 17 550             |
|                                            | Fourches                    | 37                                 | 750                   | 27 750             |
|                                            | Mangeoires                  | 101                                | 4 500                 | 454 500            |
|                                            | Abreuvoirs                  | 30                                 | 4 500                 | 135 000            |
|                                            | Bâches                      | 2                                  | 9 000                 | 18 000             |
|                                            | Paires de bottes            | 3                                  | 1 500                 | 4 500              |
|                                            | Niébé fourrager (semences)  | 69                                 | 375                   | 25 875             |
|                                            | Dolique (semences)          | 14                                 | 500                   | 7 000              |
|                                            | Sorgho fourrager (semences) | 20                                 | 150                   | 3 000              |
|                                            | Faucilles                   | 52                                 | 750                   | 39 000             |
|                                            | Charrettes                  | 21                                 | 45 000                | 945 000            |
|                                            | Brouettes                   | 19                                 | 7 500                 | 142 500            |
|                                            | <b>Total</b>                | <b>525</b>                         | <b>/</b>              | <b>4 586 673</b>   |
| Infrastr. communautaires                   | Magasins                    | 5                                  | 4 960 000             | 24 800 000         |
| <b>TOTAL GENERAL MICROPROJETS FINANCES</b> |                             | <b>530</b>                         |                       | <b>29 386 673</b>  |

\* dans la Zone de Ouagadougou.

| Microprojets                             | Noyau de Ouagadougou |               |                  | Noyau d'Ouhritenga |               |                  | Total             |
|------------------------------------------|----------------------|---------------|------------------|--------------------|---------------|------------------|-------------------|
|                                          | nombre               | Coût unitaire | Total            | nombre             | Coût unitaire | Total            |                   |
| Etables - fenils et matériel d'élevage   | 10                   | variable      | <b>4.459.730</b> | 6                  | variable      | <b>601.203</b>   | <b>5.060.933</b>  |
| Infrastructures communautaires (magasin) | 0                    |               |                  | 1                  | 5.054.121     | 5.054.121        | 5.054.121         |
| <b>Total</b>                             |                      |               | <b>4.459.730</b> |                    |               | <b>5.655.324</b> | <b>10.115.054</b> |



### Annexe 5 : Exemple de compte d'exploitation atelier BMN

| Désignation                                 | Quantité<br>(kg) | PU/kg | Coût pour 100<br>BMN | Produit        |
|---------------------------------------------|------------------|-------|----------------------|----------------|
| Mélasse                                     | 15               | 300   | 45 000               |                |
| Urée                                        | 10               | 270   | 27 000               |                |
| Ciment                                      | 10               | 135   | 13 500               |                |
| Sel iodé                                    | 10               | 200   | 20 000               |                |
| Kaolin                                      | 5                | 100   | 5 000                |                |
| Poudre d'os                                 | 10               | 100   | 10 000               |                |
| Poudre de néré                              | 10               | 100   | 10 000               |                |
| Son de mil                                  | 10               | 75    | 7 500                |                |
| Feuilles de <i>pterocarpus lucens</i>       | 10               | 75    | 7 500                |                |
| Gousses d' <i>accacia raddiana</i>          | 10               | 75    | 7 500                |                |
| Eau                                         |                  |       | 300                  |                |
| Huile pour lubrifier les moules             |                  |       | 800                  |                |
| Frais d'alimentation                        |                  |       | 20 000               |                |
| Frais de meunerie                           |                  |       | 5 000                |                |
| Dotation aux amortissements                 |                  |       | 5 000                |                |
| Savon                                       |                  |       | 250                  |                |
| Vente de BMN (100 BMN à 2 250 FCFA l'unité) |                  |       |                      | <b>225 000</b> |
| <b>Total</b>                                | <b>100</b>       |       | <b>184 350</b>       |                |
| <b>Bénéfice net</b>                         |                  |       | <b>40 650</b>        |                |

**NB:** 100 kg de mélange correspond à 10 BMN de 10 kg chaque  
Prix de revient d'un kg de BMN : 185 FCFA
