# Supplementary material
Source: MDPI journal article supplement (https://www.mdpi.com/2071-1050/13/4/2125)
Supplement: s1 [file s1]

## Projet d'appui au développement du Zébu Peul au Sahel (ZEPESA)

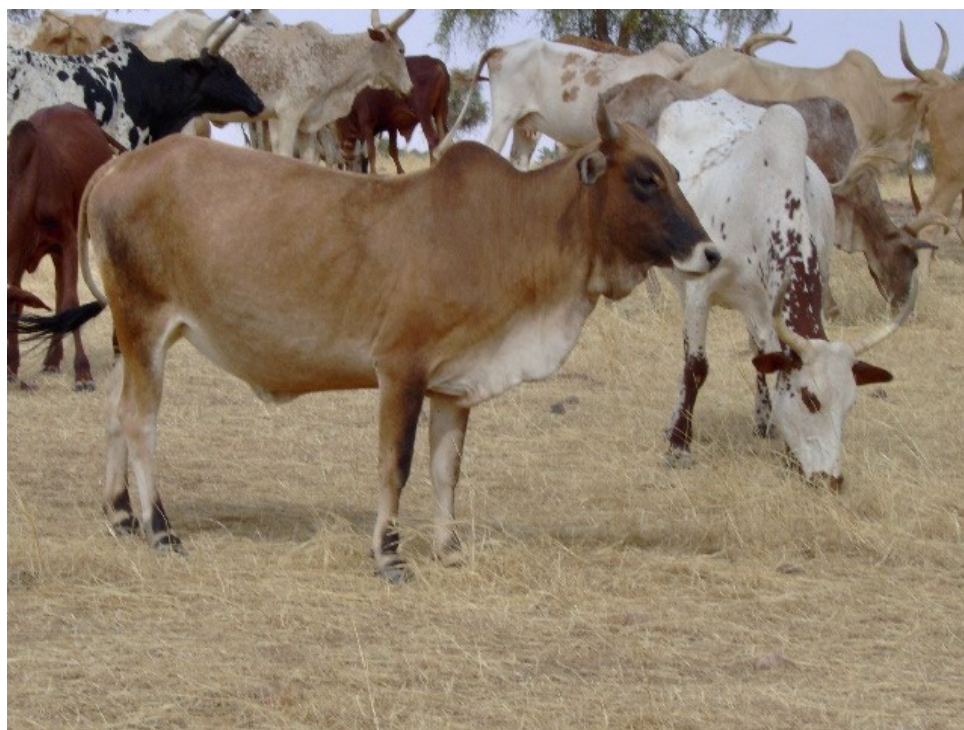

### Actes du deuxième atelier du comité de suivi des activités d'amélioration génétique Gorom - Gorom, 20 Juin 2007

#### Rapporteurs :

M. LY Boubacar/Assistant du volet Amélioration Génétique

M. BOGNANA R. Tuansi/Chargé de l'Amélioration Génétique et de l'Alimentation

*Octobre 2007*

**Projet d'Appui au Développement du Zébu Peul au Sahel (ZEPESA) - Gorom-Gorom**

**Tél. : (+226).40.46.91.24 - Fax : (+226).40.46.91.25 - Email : [zepesa@fasonet.bf](mailto:zepesa@fasonet.bf)**

**Adresse postal : 11 BP 219 Ouagadougou 11**

# **TABLE DES MATIERES**

|                                                                                       |           |
|---------------------------------------------------------------------------------------|-----------|
| <b>LISTE DES ABREVIATIONS .....</b>                                                   | <b>3</b>  |
| <b>INTRODUCTION.....</b>                                                              | <b>4</b>  |
| <b>1. DEROULEMENT DE L'ATELIER.....</b>                                               | <b>6</b>  |
| <b>2. SYNTHESE DES PRESENTATIONS .....</b>                                            | <b>7</b>  |
| <b>2.1. LA STRATEGIE D'AMELIORATION DU POTENTIEL GENETIQUE DU ZEBU<br/>PEUL .....</b> | <b>7</b>  |
| <b>2.1.1. LUTTE CONTRE LA CONSANGUINITE .....</b>                                     | <b>9</b>  |
| <b>2.1.2. SELECTION INTRA-TROUPEAUX.....</b>                                          | <b>9</b>  |
| <b>2.1.3. PROGRAMME INTEGRE DE SELECTION .....</b>                                    | <b>10</b> |
| <b>2.2. L'ETAT D'AVANCEMENT DES ACTIVITES.....</b>                                    | <b>11</b> |
| <b>2.2.1. LES ACTIVITES REALISEES EN AMONT .....</b>                                  | <b>11</b> |
| <b>2.2.2. LES ACTIVITES DE LUTTE CONTRE LA CONSANGUINITE .....</b>                    | <b>12</b> |
| <b>2.2.3. LES ACTIVITES DE SELECTION .....</b>                                        | <b>13</b> |
| <b>2.2.4. L'ANALYSE DE LA DURABILITE DE L'UTPP .....</b>                              | <b>14</b> |
| <b>2.2.5. LES ACTIVITES COLLATERALES .....</b>                                        | <b>15</b> |
| <b>2.3. L'ANALYSE DU VOLET.....</b>                                                   | <b>16</b> |
| <b>2.4. LES ACTIVITES EN PERSPECTIVE.....</b>                                         | <b>17</b> |
| <b>3. SYNTHESE DES DEBATS.....</b>                                                    | <b>18</b> |
| <b>4. RECOMMANDATIONS.....</b>                                                        | <b>19</b> |
| <b>CONCLUSION.....</b>                                                                | <b>21</b> |
| <b>ANNEXES.....</b>                                                                   | <b>23</b> |

## **LISTE DES ABREVIATIONS**

|                 |                                                                    |
|-----------------|--------------------------------------------------------------------|
| <b>A2N :</b>    | Association Nodde Nooto                                            |
| <b>AG</b>       | Amélioration Génétique                                             |
| <b>CIRDES</b>   | Centre Internationale de Recherche Développement en zone Subhumide |
| <b>CL :</b>     | Comité Local                                                       |
| <b>CMAP :</b>   | Centre national de Multiplication des Animaux Performants          |
| <b>CS :</b>     | Comité de Suivi                                                    |
| <b>CSLP :</b>   | Cadre Stratégique de Lutte contre la Pauvreté                      |
| <b>DAG :</b>    | Direction de l'Amélioration Génétique                              |
| <b>DPRA :</b>   | Direction Provinciale des Ressources Animales                      |
| <b>DRRA :</b>   | Direction Régionale des Ressources Animales                        |
| <b>EE</b>       | Eleveur Encadré (adhérant au programme d'amélioration génétique)   |
| <b>ES</b>       | Eleveur Sélectionneur                                              |
| <b>FAR</b>      | Femelle en Age de Reproduction                                     |
| <b>FBS :</b>    | Fonds Belge de Survie                                              |
| <b>GMQ :</b>    | Gain Moyen Quotidien                                               |
| <b>INERA :</b>  | Institut de l'Environnement et de Recherches Agricoles             |
| <b>LNE</b>      | Laboratoire National d'Elevage                                     |
| <b>MRA :</b>    | Ministère des Ressources Animales                                  |
| <b>ONG :</b>    | Organisation Non Gouvernementale                                   |
| <b>OPE :</b>    | Organisation Professionnelle d'Eleveurs                            |
| <b>PAPISE :</b> | Plan d'Actions et Programme d'Investissements du Secteur d'Elevage |
| <b>PDES2</b>    | Projet de Développement de l'Elevage au Soum phase2                |
| <b>PPTTC</b>    | Parc Polyvalent de Testage Traitement et Commercialisation         |
| <b>PSDZA2 :</b> | Projet de Soutien à la Diffusion du Zébu Azawak -phase 2           |
| <b>UTPP</b>     | Unité de Testage Provisoire de Proximité                           |
| <b>VSF-B :</b>  | Vétérinaires Sans Frontières - Belgique                            |
| <b>ZEPESA :</b> | Projet d'appui au développement du Zébu Peul au Sahel              |

# INTRODUCTION

Au Burkina Faso, comme dans grand nombre de pays en voie de développement, la diversité des animaux domestiques s'est maintenue et se maintient grâce aux communautés agricoles et pastorales traditionnelles. Ces communautés gèrent leur cheptel en accord avec leurs connaissances traditionnelles et avec les contraintes écologiques.

Dans les milieux à aptitude marginale, comme le Sahel burkinabé, les races locales jouent un rôle décisif pour le maintien durable des systèmes de production ruraux dans la mesure où elles fournissent un large éventail de produits tout en étant relativement peu exigeantes en intrants, notamment en fourrage, en mesure de gestion et en soins de santé. Ainsi, les races locales sont les produits d'environnements écologiques et culturels spécifiques, soumis à un processus de formation et d'adaptation leur permettant de réagir à des conditions écologiques changeantes.

Au Burkina Faso, le Ministère des Ressources Animales a recensé deux races locales bovines et une métisse fixées, à savoir le Zébu Peul Soudanais, le Baoulé et le Méré<sup>1</sup>. Lorsqu'on examine l'ensemble des politiques, stratégies et programmes passées en matière de promotion de l'élevage au Burkina Faso, on constate que ce n'est qu'à partir de la « Note d'orientation du Plan d'action de la politique de développement du secteur de l'élevage », adoptée en novembre 1997, que le secteur de l'élevage au Burkina a préconisé de « *travailler en priorité sur le matériel animal local, adapté aux conditions écologiques particulières qui prévalent sous les tropiques et l'amener à extérioriser ses potentialités* ».

Cette orientation stratégique du MRA sera confirmée et développée davantage lors de la finalisation du « Plan d'actions et programme d'investissements du secteur de l'élevage » (PAPISE), adopté en octobre 2000. Ce document fait le diagnostic des contraintes du secteur de l'élevage, donne les axes d'intervention et les programmes prioritaires pour le développement de l'élevage au Burkina Faso. Ainsi, l'amélioration de la productivité des animaux est retenue comme étant un axe prioritaire, notamment à travers des interventions portant sur l'amélioration génétique à travers :

- Une rationalisation de la gestion des troupeaux notamment par des encouragements à l'élimination des reproducteurs peu performants ;
- La diffusion du principe de sélection à noyau ouvert, des fermes pilotes d'élevage d'élite et des groupes tests pour la sélection des géniteurs ;
- L'introduction des races africaines performantes ;

Ces objectifs sont recherchés à travers notamment l'élaboration de critères de sélection prenant en compte les préoccupations et l'expérience des producteurs et la mise en place d'un système de contrôle et d'enregistrement des performances des catégories d'exploitation avec le marquage de tous les animaux pour un meilleur suivi généalogique<sup>2</sup>.

---

<sup>1</sup> Rapport sur l'état des ressources génétiques animales au Burkina Faso. Ministère des Ressources Animales, Mai 2003.

<sup>2</sup> Plan d'actions et programme d'investissements du secteur de l'élevage. Ministère des Ressources Animales, Octobre 2000, pages 86-87 et pages 118-120.

Alors que la nécessité de préserver et promouvoir la diversité des ressources zoogénétiques au niveau communautaire est incontestée, il est rare que des projets voués à cette cause aient été entrepris dans le contexte de la coopération au développement.

L'idée d'un projet visant à l'amélioration de l'élevage du Zébu Peul, qui constitue la race dominante au Burkina Faso, est née des contacts entre Vétérinaires Sans Frontières - Belgique et le MRA en 2003. Ceux-ci ont permis de dégager une identité de vue sur les stratégies d'actions et sur l'approche à mener pour assurer un développement de l'élevage dans la perspective d'une promotion durable des éleveurs et de leurs familles. Suite aux missions d'identification et de formulation<sup>3</sup>, le projet a obtenu un premier financement de quatre ans du Fonds Belge de Survie (FBS) et le lancement officiel des activités a eu lieu en décembre 2005<sup>4</sup>. Pour sa contribution à la diminution de la pauvreté au niveau de la Région du Sahel, le projet ZEPESA met l'accent sur l'augmentation des productions des Zébus Peul.

L'amélioration génétique a été définie par le projet ZEPESA comme le pivot des axes d'intervention pour augmenter les productions du zébu peul. L'amélioration génétique en milieu paysan est très complexe et assez difficile. La recherche d'un large consensus autour de l'approche et de la méthodologie paraissait inévitable. Cela a amené le projet à procéder à la mise en place d'un comité de suivi des activités en 2006. Le comité de suivi a tenu le 05 Mai 2006 son premier atelier sur la validation des critères de sélection du zébu peul. Il s'est réuni encore le 20 Juin 2007 au compte du deuxième atelier pour évaluer l'état d'avancement des activités. Le présent document est un recueil de l'ensemble des travaux qui se sont déroulés au cours de cet atelier. Le projet ZEPESA vise, à travers la publication de ce document, le renforcement de la collaboration avec les partenaires dans l'exécution des activités.

---

<sup>3</sup> La mission de formulation a été conduite du 05 au 25 Octobre 2003 par M. Guy Van Vlaenderen conseiller technique de VSF/B dans la région du Sahel.

<sup>4</sup> Le ZEPESA est prévu pour une durée de 13 ans répartie : 1 phase de 4 ans, exécutée dans la seule province de l'Oudalan, et deux phases de 6 et 3 ans respectivement exécutées dans d'autres provinces voir dans l'ensemble de la région du Sahel.

# 1. DEROULEMENT DE L'ATELIER

L'atelier du comité de suivi<sup>5</sup> est organisé dans le but de permettre au comité de suivi d'examiner et d'évaluer les activités réalisées par le ZEPESA par rapport au volet amélioration génétique. En préparation du deuxième atelier de l'année 2007 sur l'état d'avancement des activités, le comité a effectué une sortie d'observation des animaux sélectionnés le 19 Juin dans le village de Gonadaouri. Ont fait partie de la sortie, la Direction de l'Amélioration Génétique (DAG), le Centre national de Multiplication des Animaux performants (CMAP), la Direction Régionale des Ressources Animales du Sahel (DRRA), l'Institut de l'Environnement de recherches Agricoles (INERA), la Direction Provinciale des Ressources Animales de l'Oudalan (DPRA) et la Clinique Vétérinaire Kallassal (CVK). Dans le village de Gonadaouri, les membres du comité de suivi ont eu une rencontre d'échanges d'une trentaine de minutes avec les ES résidents. Les échanges ont surtout porté sur la démarche, les difficultés<sup>6</sup> et les préoccupations des ES. Après les échanges, trois troupeaux d'élites ont été visités par le comité de suivi. Les membres du comité de suivi ont exprimé leur satisfaction par rapport à la sélection opérée. Ils ont exhorté le projet à mettre d'avantage l'accent sur l'alimentation à travers l'appui à la constitution de stocks de foin.

L'atelier s'est tenu le 20 juin 2007, dans la salle de réunion du Projet de Partenariat pour l'Amélioration de la gestion des Ecosystèmes Naturels (PAGEN) à Gorom-Gorom. En plus du comité de suivi et des ES, étaient présents les autorités administratives de la province.

L'atelier a débuté aux environs de neuf heures (9h) avec l'allocution du Haut commissaire de la province. A l'issue du discours d'ouverture, les participants se sont présentés à travers un tour de table (*la liste des participants est présentée en annexe 4*). Après les présentations, la salle a été réaménagée pour permettre le début des travaux. La première présentation a portée sur les axes d'intervention du projet. Les autorités administratives se sont excusées à la fin du premier exposé, elles se sont retirées pour permettre aux techniciens de poursuivre l'atelier avec les travaux liés à la thématique. Une équipe de modérateurs composée du directeur de l'amélioration génétique et du chef de projet a alors été mise en place pour faciliter le déroulement des travaux. Les modérateurs après avoir soumis le programme à l'appréciation des participants (*un exemplaire du programme est présenté en annexe 3*) ont autorisé la poursuite des travaux.

Les communications ont commencé par la lecture et l'amendement du rapport du dernier atelier tenu le 05 Mai 2006. Un rappel de la stratégie d'amélioration génétique a suivi l'adoption du rapport. Puis les exposants ont présenté les activités réalisées au cours de l'année 2007. Les exposés ont été bouclés par une analyse du volet amélioration génétique effectuée par le projet.

A l'issue des exposés, les modérateurs ont ouvert le débat. Plusieurs interventions ont été enregistrées. Les débats se sont orientés principalement vers l'implication des ES et des membres de leur famille respective pour la pérennité des actions, l'alimentation des animaux encadrés et le

---

<sup>5</sup> Le comité de suivi est composé des représentants des éleveurs encadrés et des scientifiques représentant les directions du MRA chargées de l'amélioration génétique et institutions de recherche du secteur de l'élevage. Il est chargé de suivre et d'évaluer les activités réalisées par le ZEPESA et les éleveurs encadrés par rapport au volet amélioration génétique.

<sup>6</sup> Les difficultés évoquées par les ES sont principalement la disponibilité de bon taureaux et son coût très élevé.

dispositif de suivi des performances. Les échanges ont été très fructueux avec beaucoup de contribution de la part des participants. A la fin des échanges, l'atelier a fait des recommandations au projet et aux ES.

Au terme des travaux, les autorités administratives sont revenues dans la salle pour la clôture. Le directeur de l'amélioration génétique en sa qualité de président de séance a fait un bref aperçu du déroulement des travaux à l'intention des autorités. En fin de propos, il a dit toute sa satisfaction de l'atelier en tant que directeur de l'amélioration génétique. La fin de l'atelier est intervenue aux environs de quinze heures (15h) avec le mot de clôture du Haut commissaire de la province.

## 2. SYNTHESE DES PRESENTATIONS

Les communications qui ont été données au cours de l'atelier ont porté sur trois points :

1. Le rappel de la stratégie d'amélioration du potentiel génétique du Zébu Peul ;
2. L'état d'avancement des activités d'amélioration génétique ;
3. L'analyse du volet amélioration génétique ;
4. Les activités en perspective.

### 2.1. La stratégie d'amélioration du potentiel génétique du Zébu Peul

L'objectif spécifique que doit atteindre le projet ZEPESA en fin de première phase est le suivant : **« Les productions des bovins de race Zébu Peul sont augmentées ».**

La réalisation de cet objectif sera évaluée d'une part, par le nombre d'éleveurs adhérant au programme (1.375) et l'effectif en cheptel (13.000 têtes) et d'autre part, par l'augmentation des productions du cheptel encadré. Cette augmentation serait appréciée au travers de l'accroissement de la production laitière par vache en lactation (de x à y litres/vache/lactation<sup>7</sup>) et l'accroissement de la productivité numérique par vache (de 0,44 à 0,5 veaux sevrés/vache présente/an<sup>8</sup>).

Pour ce faire, le projet est articulé autour de 6 résultats principaux, dont le premier est : *« Le potentiel génétique des Zébus Peuls est amélioré de manière durable avec la participation active des éleveurs ».*

L'objectif premier est d'accroître la rentabilité économique de la race locale et sa contribution au bien être des ménages grâce à une combinaison de diverses mesures, dont notamment l'amélioration génétique par le biais de la sélection, l'organisation des éleveurs, l'amélioration des conditions alimentaires et du statut sanitaire et l'amélioration des réseaux commerciaux.

---

<sup>7</sup> L'évaluation de la production laitière en cours d'intervention se réalisera par le suivi zootechnique mis en place dans des troupeaux tests.

<sup>8</sup> Cette amélioration de la productivité numérique résulte des actions menées dans les domaines de l'amélioration génétique (lutte contre la consanguinité) et de l'amélioration des conditions sanitaires et alimentaires.

L'amélioration génétique sur la race Zébu Peul constitue un levier important pour l'amélioration de la production du cheptel (pour autant qu'elle soit complétée par des mesures d'accompagnement dans les domaines sanitaires et alimentaires).

En effet, les constats dégagés par la mission de formulation montrent clairement une situation ambiguë sur le plan génétique :

- La pratique de la consanguinité étroite<sup>9</sup> est très fréquente aussi bien en milieu pastoral qu'en milieu agropastoral. Cette situation résulte du maintien sur une longue période du reproducteur mâle (généralement 6 à 8 ans d'activité au sein du même troupeau, ce qui entraîne des saillies père-filles) ainsi que du choix du remplaçant parmi la descendance de ce taureau (ce qui implique des saillies frère-sœur et fils-mère).
- Bien que possédant de bonnes connaissances pratiques sur les critères prévalant à l'identification des meilleures lignées et des meilleurs reproducteurs mâles et femelles (qualité laitière de l'ascendance, conformation, caractères phénotypiques liés à la reproduction et à la production, ...), les éleveurs mettent rarement en œuvre ce savoir-faire dans l'optique d'un progrès génétique. En effet, outre la pratique de la consanguinité, l'absence d'élimination des sujets les moins performants entraîne une régression du potentiel génétique du troupeau<sup>10</sup>.
- En outre, certains critères de choix des éleveurs n'ont pas de base scientifique pour un accroissement des productions (longueur et finesse de la queue, disposition de l'épi de poils sur le front ou l'échine...).

Il apparaît donc indispensable d'assister et de guider les éleveurs dans le domaine de l'amélioration génétique. Par contre, les connaissances ancestrales des éleveurs, notamment en matière d'adaptation des animaux aux conditions précaires d'élevage en zone sahélienne, peuvent compléter harmonieusement les critères zootechniques d'une sélection plus rationnelle. La participation effective des éleveurs à un programme d'amélioration génétique de la race Zébu Peul présente, en outre, l'avantage, par rapport à une station de sélection, d'élargir considérablement la base de sélection.

Il s'agit d'une stratégie à long terme qui s'articule autour de onze (11) étapes, dont certaines se recoupent dans l'espace et dans le temps. *Une présentation schématique de la stratégie est jointe en annexe 6.*

Trois principaux **facteurs de succès** conditionnent cette stratégie et représentent des activités

---

<sup>9</sup> Cette consanguinité entraîne des risques non négligeables notamment en matière d'apparition de tares, de réduction de la production laitière d'une génération à une autre et d'un allongement de l'intervalle entre mise bas (diminution de la fécondité des vaches).

<sup>10</sup> Les vaches moins bonnes laitières ne sont pas (ou sont peu) traitées et sont remises rapidement à la reproduction. Il en résulte que l'intervalle entre mise bas des vaches mauvaises laitières est sensiblement plus court (12-18 mois) que celui des vaches bonnes laitières (18-24 mois). De ce fait, la descendance des lignées mauvaises laitières est plus nombreuse et la proportion lignées mauvaises laitières/lignées bonnes laitières s'accroît régulièrement en l'absence de sélection (élimination).



continues et transversales. Il s'agit de :

- La formation/information des éleveurs sur la stratégie d'amélioration génétique du ZEPESA ;
- La sensibilisation et la formation des éleveurs sur la lutte contre la consanguinité. Une activité continue pour laquelle il faudra développer des supports de sensibilisations appropriés ;
- Le renforcement du Comité Local<sup>11</sup>. Une activité transversale qui vise l'autonomisation du CL dans l'objectif d'amplifier les messages et les actions portées par le projet tout en travaillant à leur pérennisation dans le temps ;

La stratégie proposée par le projet ZEPESA repose sur trois principes : (1) la lutte contre la consanguinité, (2) la sélection intra-troupeau et (3) le programme intégré de sélection. L'originalité de la prestation réside donc dans la complémentarité entre les connaissances ancestrales des éleveurs traditionnels et les méthodes plus scientifiques des techniciens et chercheurs.

### **2.1.1. Lutte contre la consanguinité**

Compte tenu du constat fait sur la pratique de la consanguinité lors de la mission de formulation du projet, la lutte contre la consanguinité occupe une place importante dans la stratégie d'amélioration génétique du projet et constitue la première étape de l'intervention.

Dans la démarche, le temps d'utilisation du taureau reproducteur est limité à quatre ans au maximum chez les éleveurs encadrés (EE). Ainsi après quatre années d'utilisation, le taureau reproducteur est éliminé du troupeau et il est remplacé par un autre taureau qui est acheté chez un éleveur encadré et adhérent au projet.

Dans cette démarche, le projet accompagne les éleveurs à travers la sensibilisation sur le problème représenté par une consanguinité mal gérée et par l'appui à l'acquisition de taureaux de remplacement. Par ce fait, il permet un apport de nouveau sang dans les troupeaux encadrés. A cette étape, il est indispensable d'identifier les éleveurs à encadrer qui doivent être des éleveurs convaincus et engagés à lutter contre la consanguinité.

### **2.1.2. Sélection intra-troupeaux**

La sélection des animaux est la deuxième étape de cette stratégie. C'est une sélection qui s'opère à l'intérieur du troupeau. Les femelles de bonne lignée laitière (appelées vaches d'élites) sont sélectionnées et mises à la reproduction avec un bon taureau non consanguin choisi comme géniteur. Les montes sont contrôlées et raisonnées (meilleur taureau avec vaches d'élites). Les

---

<sup>11</sup> Le comité local a été mis en place en 2006, il est composé de personnes ressources en élevage, essentiellement des éleveurs au niveau régional (Soum, Séno, Yagha et Oudalan). Il cohabite auprès des scientifiques dans le comité de suivi des activités d'amélioration génétique. Sa mission est de faire valoir les connaissances endogènes des éleveurs.

meilleurs veaux issus des montes raisonnées sont ensuite mis sous un programme de suivi et d'appréciation des performances (croissance, gabarit, ardeur sexuel). Ils seront ensuite classifiés dans le but d'être vendus à d'autres éleveurs adhérant au programme et diffuser ainsi le progrès génétique de la race locale. Les produits issus des mauvaises lignées sont éliminés.

La sélection des meilleurs animaux est faite sur la base de critères établis par consensus avec tous les acteurs concernés (éleveurs, projet et scientifiques). La réalisation des montes raisonnées reste l'activité la plus importante à cette étape.

Une des contraintes à l'amélioration génétique dans l'élevage bovin sahélien est l'absence d'élimination de sujets mauvais dans les troupeaux. Cette deuxième étape de la stratégie d'amélioration génétique qui consiste à sélectionner les meilleurs animaux et à éliminer les mauvais sujets contribuera à lever cette contrainte.

### 2.1.3. Programme intégré de sélection

Le programme intégré de sélection est la dernière étape de la stratégie. Il parachève toute la démarche. Il vise à assurer la durabilité de l'action d'amélioration génétique. En ce sens, il pose les véritables bases d'une action durable. Le programme de sélection repose sur les points ci-dessous :

- La diffusion du progrès génétique chez les éleveurs encadrés par le biais de géniteurs mâles
- La participation active des éleveurs sélectionneurs pour permettre la production de taurillons de bonne qualité
- La mise en place de Parcs Polyvalents de Traitement Testage et de Commercialisation (PPTTC<sup>12</sup>).
- L'appui scientifique des partenaires techniques

A travers ce programme, un choix est opéré parmi les EE par les OPE des villages d'intervention et le projet pour désigner les Eleveurs Sélectionneurs<sup>13</sup> (ES) des taurillons à mettre sous-programme. Les ES sont désignés sur la base d'un certain nombre de critères, en l'occurrence, la disposition de vaches zébu peul de bonne lignée laitière, la conduite individuelle du troupeau, etcetera. Ils remplissent en plus un cahier de charges (*annexe 7*) qui les engage à lutter contre la consanguinité et à réaliser des montes raisonnées, aussi ils s'engagent à appliquer tout le paquet technologique du projet.

Les meilleurs veaux issus des montes raisonnées sont sélectionnés chez les ES, le projet assure alors leur suivi jusqu'à maturité. Leur alimentation et leur santé sont suivies de prêt par le projet et le cabinet vétérinaire KALLASSAL. En plus, des mesures sont régulièrement faits sur eux au

---

<sup>12</sup> Le PPTTC se substitue à l'Unité de Testage Provisoire de Proximité (UTPP) prévue initialement, les mesures de performances, les testages y seront faits. Sa mise en place est prévue pendant la deuxième phase du projet.

<sup>13</sup> Les ES sont des éleveurs encadrés par le projet chez qui les troupeaux d'élites composés des animaux encadrés sont constitués et suivis par le projet. Ils participent activement au programme de sélection et sont chargés de produire de bons taurillons avec l'appui du projet qui seront vendus aux éleveurs encadrés.

niveau du PPTTC pour apprécier leurs performances zootechniques. En fin de croissance, ils sont classés par catégories sur la base de leurs performances zootechniques et à l'issue d'un certain nombre de tests, en rapport notamment avec leur vigueur sexuelle et éventuellement la qualité du sperme et leur caractère indemne de maladie sexuellement transmissible. Les taurillons de première et deuxième catégorie sont porteurs de progrès génétique, ils sont par conséquent vendus aux ES et EE pour favoriser la diffusion du progrès génétiques. Les taurillons de première catégorie sont vendus aux ES compte tenu de leur statut d'éleveurs privilégiés et les taurillons de deuxième catégorie sont vendus aux EE. Les taurillons de troisième catégorie sont vendus aux éleveurs tout venants. Tandis que les moins bons individus sont destinés à la réforme.

Le fonctionnement du PPTTC sera assuré par le projet, les ES mais aussi par des partenaires techniques à travers des appuis réguliers. Ces partenaires sont notamment :

- le Laboratoire National d'Elevage (LNE) pour les tests épidémiologiques ;
- Le CMAP pour le contrôle des qualités de reproduction, le suivi des performances zootechniques et l'établissement d'une grille de classement ;
- la recherche (INERA, Université de Ouagadougou et de Bobo-Dioulasso, etcetera) pour l'analyse de la valeur intrinsèque des individus.

En outre, afin d'inciter le suivi des animaux et de capitaliser les résultats pour permettre une meilleure diffusion de ceux-ci et un élargissement « à tache d'huile » des acquis du projet, l'accent sera mis sur la tenue de registres de performances des animaux sous-programme et sur l'organisation de concours d'animaux.

## **2.2. L'état d'avancement des activités**

L'activité « phare » du projet ZEPESA, l'amélioration génétique en milieu paysan est une activité innovante au Burkina Faso. Conscient de ce fait, le projet a mené, depuis la première année (2006<sup>14</sup>), des réflexions avec les différents partenaires et acteurs du secteur de l'élevage autour des préoccupations majeures relatives notamment à la race zébu peul et à la sélection. Comme résultats, on se rappelle que le précédent atelier tenu le 05 Mai 2006 a validé deux études conduites par le projet : l'une sur la caractérisation des élevages bovins de la province de l'Oudalan<sup>15</sup> qui a abouti à la description de trois (03) sous-types du zébu peul et l'autre sur les critères de sélection du zébu peul. Conformément à son programme d'activités de l'année 2007 présenté lors du même atelier, le projet a réalisé un certain nombre d'activités dans le cadre du programme de sélection. Il s'agit principalement : des activités d'élargissement du champ d'action du projet<sup>16</sup>, des activités de lutte contre la consanguinité, des activités de sélections mais aussi des activités collatérales au programme de sélection.

---

<sup>14</sup> 2006 est l'année du début de l'exécution des activités du projet, sinon, lancé officiellement en Décembre 2005, le projet existe depuis Juin 2005.

<sup>15</sup> Cette étude a été réalisée par un stagiaire du projet, M. ZIO Drissa Ingénieur zootechnicien, de Janvier à Juin 2006.

<sup>16</sup> En 2006, le projet intervenait uniquement dans le seul département de Oursi, le programme de l'année 2007 prévoyait un élargissement des actions du projet à deux autres départements de la province que sont Markoye et Tin-Akoff.

### **2.2.1. Les activités réalisées en amont**

Au cours de l'an 2007 l'intervention du ZEPSA s'est élargie aux communes de Markoye et de Tin-Akoff. Dans ces nouvelles communes, le projet a conduit des séances d'animation avec les éleveurs des villages pour expliquer la stratégie d'amélioration génétique. A l'issue de plusieurs séances, des éleveurs se sont manifestés pour adhérer au programme d'amélioration génétique. Ainsi six (06) nouveaux villages ont pu participer aux activités du projet. Ceci porte le nombre total de villages encadrés par le projet pour le volet amélioration génétique à huit (08).

Aussi pour faciliter l'exécution des activités dans les villages, trois (03) nouveaux animateurs ont été recrutés comme ambassadeurs du projet dans les communes. Les animateurs sont chargés de l'appui des éleveurs encadrés à la mise en œuvre efficace des activités. Une session de formation sur la démarche du projet relative à l'amélioration génétique a permis de les outiller pour l'exécution des activités.

Un assistant du volet amélioration génétique, spécialiste de la sélection et reproduction des bovins a également été recruté pour appuyer la mise en œuvre du programme de sélection.

### **2.2.2. Les activités de lutte contre la consanguinité**

La consanguinité vue par les éleveurs de la province est une bonne chose, puisque dans leurs habitudes en élevage, ils font la pratique courante de la consanguinité étroite. Cet aspect n'a pas échappé à la mission de formulation qui l'a relevé. L'étude sur la caractérisation des élevages bovins dans la province de l'Oudalan a également mis en exergue cette pratique. Cependant la consanguinité non maîtrisée peut être un vecteur de la transmission des tares dues à des gènes récessifs de génération en génération. D'aucun pensent que les baisses de production du zébu peul seraient en bonne partie la conséquence de la consanguinité pratiquée par les éleveurs depuis plusieurs générations. A en croire les performances d'antan du zébu peul par rapport à la production laitière, on ne pourrait pas lier les baisses de production aux seuls aspects de dégradation des conditions sanitaires et alimentaires. Il est assez courant, même de nos jours, de voir des éleveurs faire la sélection des animaux sur la base des aspects liés à la consanguinité, notamment sur des caractères morphologiques essentiellement basés sur la couleur de la robe. Dans la pratique, ils maintiennent le même géniteur dans le troupeau plusieurs années durant (de 06 à 08 ans) et lorsqu'il faudrait le remplacer, un taureau de sa descendance est choisi pour ainsi perpétuer le sang disent-ils. Ils obtiennent ainsi un troupeau homogène et uniforme par rapport à la couleur de la robe. Cela est un motif de satisfaction, c'est un prestige d'avoir des troupeaux de robe uniforme puisqu'on arrive à se faire identifier par son troupeau.

Par rapport aux pratiques courantes, la tâche du projet en matière de lutte contre la consanguinité est déjà assez difficile. Pour atteindre ces objectifs dans cette lutte, le projet a mis l'accent depuis 2006 sur la sensibilisation à grande échelle de tous les EE. Les résultats obtenus ont été satisfaisants. Néanmoins dans la poursuite de la lutte de longue haleine contre cette pratique, le ZEPESA a développé courant l'an 2007 un système de communication plus approprié basé sur les images (boîte à images). Les images utilisées ressortent les pratiques courantes des éleveurs en matière de consanguinité et pose par la suite les problèmes liés à la consanguinité :

malformations, problèmes affectant la reproduction et ceux affectant les productions (lait, viande, ...). Les images proposent une alternative pour résoudre les problèmes qui reposent sur la lutte contre la consanguinité par le renouvellement régulier de géniteur par un bon taureau non consanguin acheté chez un autre éleveur. Ce nouvel outil de sensibilisation a été utilisé pendant les séances de sensibilisation (38 séances) avec les EE des trois (03) départements. On a pu retenir qu'en regardant les images défiler devant eux, les éleveurs se reconnaissent dans les faits, ils assimilent mieux le message qui est véhiculé, par conséquent, ils sont prêts à opérer un changement dans la conduite de leur élevage.

La lutte contre la consanguinité va au delà de la sensibilisation car il est question de remplacement régulier de géniteur. Les bons taureaux en guise de géniteurs sont difficiles à trouver et ils sont très chers<sup>17</sup>. Le projet, conscient de cette situation et pour soutenir les ES dans leur effort de lutte contre la consanguinité, a pris des mesures d'accompagnement dans l'acquisition de taureaux qu'il a discutées en atelier avec l'ensemble des ES. Ces mesures portent essentiellement sur l'échange de taureaux entre ES et sur l'octroi d'une subvention<sup>18</sup> aux ES ne disposant pas de taureau pour l'acquisition d'un géniteur.

La lutte contre la consanguinité est une activité permanente à laquelle sont tenus tous les EE du projet. A moyen terme, la disponibilité de bons taureaux sera assurée par les taurillons<sup>19</sup> issus de montes raisonnées qui seront mis en vente par les ES.

### **2.2.3. Les activités de sélection**

Dans le cadre du programme de sélection du zébu peul, une table de critères élaborée de commun accord avec les éleveurs pour guider dans le choix des animaux à mettre sous le programme avait été validée en 2006 par le comité de suivi. Il était impératif pour la réussite du programme de sélection d'avoir un consensus et de la précision en ce qui concerne les critères.

Cependant, il est à reconnaître d'abord aux éleveurs la capacité de faire la part des critères de reconnaissances de leurs animaux qu'ils ont utilisés et forgés au cours des siècles. Les éleveurs reconnaissent notamment les aptitudes générales (lait, viande, viabilité, fertilité, résistance) de leurs bovins et savent comparer les animaux entre eux. C'est pourquoi le premier choix des animaux est fait par l'ES selon ses propres connaissances des animaux, ensuite le comité local procède à la sélection définitive des animaux à encadrer en se référant aux critères qui prévalent au niveau du programme de sélection.

Dans la pratique la sélection des animaux commence d'abord par l'identification des éleveurs encadrés disposant de troupeaux de base important pour la sélection. C'est ainsi que parmi les éleveurs encadrés, des ES au nombre de 28 ont été choisis dans les 08 villages encadrés. Auparavant, des séances de travail avec la participation des EE ont permis de parachever le

---

<sup>17</sup> Le coût estimatif (selon les éleveurs) d'un bon taureau est compris entre 350 000 et 400 000 FCFA.

<sup>18</sup> Le projet apporte une subvention à hauteur de 100 000 FCFA à tout ES dans le besoin d'acquérir un taureau.

<sup>19</sup> L'objectif du ZEPESA est de parvenir à produire avec les ES des taurillons performants à l'issue des montes raisonnées. La valeur intrinsèque des taurillons devra s'accroître au fil des générations.

cahier des charges<sup>20</sup> des ES et de le traduire dans les différentes langues du terroir (fulfulde, tamasheq, sonrhäi). Les 28 ES ont identifié dans leurs troupeaux 233 Femelles en Age de Reproduction (FAR) pour le programme de sélection. Les 233 FAR ont été définitivement sélectionnées par le projet et le comité local après vérification des critères de sélection. Aussi sur un total de 22 taureaux pré-identifiés par les ES, 06 ont été jugés conformes et admis au niveau du programme de sélection. Les taureaux non conformes ont été exclus des troupeaux d'élites, les propriétaires ont été sensibilisés à les sortir.

La disponibilité de bons taureaux zébu peul au niveau de l'air d'intervention du projet est une préoccupation qui avait été posée par les éleveurs depuis le début du projet. Il est assez fréquent de trouver des troupeaux de bovins sans aucun taureau reproducteur, les bergers profitent ainsi de leur rencontre avec d'autres au pâturage pour favoriser les saillies de vaches en chaleur par des taureaux tout venants. Cette pratique encore en cours au niveau de la province peut être une entrave sérieuse au programme de sélection du zébu peul. C'est pourquoi dans le cahier des charges, chaque ES a pris l'engagement de garder ses animaux sous le programme avec la prise en charge d'un berger qu'il aura bien sensibilisé avec l'appui du projet. Les ES ne disposant pas de taureaux ou ayant des taureaux non conformes ont bénéficié de l'appui du projet pour acquérir de bons taureaux. L'appui du projet s'est traduit par la mise en place d'un comité de recherche et d'achat de bons taureaux dans chaque département et par la subvention d'une partie des frais d'achat de taureaux. Cette mesure a permis d'avoir dans chacun des 28 troupeaux d'élites un bon géniteur zébu peul.

Enfin une base de données photographique a été mise en place par le projet. Les photos des 261 animaux (FAR et géniteurs) sont disponibles.

L'amélioration génétique constitue un des axes stratégiques de la politique sectorielle du MRA. Il est, par ailleurs, indispensable que l'Etat exerce ses prérogatives en matière de préservation du patrimoine génétique du cheptel burkinabé. Le ZEPESA ayant intégré dans ses objectifs l'amélioration génétique de la race Zébu Peul, il paraît donc normal d'impliquer les structures étatiques et/ou privées spécialisées dans la conception et la mise en œuvre du programme y afférant. C'est ce qui a prévalu à la mise en place du comité de suivi des activités du volet amélioration génétique. Ce comité examine et évalue l'exécution du programme de sélection et donne des avis motivés concernant les aspects scientifiques et méthodologiques. Le comité de suivi se réunit une fois par an en séance ordinaire et à chaque fois que de besoin. Dans le souci de la durabilité, le comité de suivi sera formalisé et placé sous la responsabilité du DAG.

## **2.2.4. L'analyse de la durabilité de l'UTPP**

Initialement la mise place d'un centre de sélection était prévue en collaboration avec le Projet de Soutien à la Diffusion du Zébu Azawak (PSDZA2). Il s'agit du centre de sélection auquel étaient destinés les taurillons issus des montes raisonnées. Pour des raisons d'efficience l'idée du centre

---

<sup>20</sup> Le cahier des charges des ES définit les engagements des ES et du projet vis-à-vis du programme de sélection, les engagements pris par les éleveurs visant à garantir des montes raisonnées, en l'occurrence, le gardiennage du troupeau et le maintien dans le troupeau d'un seul taureau sélectionné comme géniteur y figurent en plus de bien d'autres.

de sélection avait évolué vers l'Unité de Testage Provisoire de Proximité (UTPP) car après l'évaluation du PSDAZ2<sup>21</sup>, il n'était plus question de procéder à la mise en place d'un centre de sélection au niveau du Sahel.

L'UTPP est jugé inopportun au stade actuel de l'évolution des activités où les ES ne sont qu'à l'étape de sélection des FAR et la constitution des troupeaux d'élites. Plusieurs étapes devraient précéder la mise en place de l'UTPP, c'est notamment la réalisation des montes raisonnées par les ES et la sélection des veaux après les mises-bas. Les ES avaient émis des réserves par rapport au transfert des taurillons dans l'UTPP, ils avaient souhaité garder les veaux et les taurillons dans leur troupeau auprès d'eux. Cette situation avait amené le ZEPESA à procéder à une analyse de l'adoption technologique et socioculturelle de la démarche proposée. Le ZEPESA avait alors eu plusieurs rencontres d'échanges avec les partenaires<sup>22</sup> autour de la faisabilité de la stratégie proposée à l'issue desquelles il a fait une proposition d'amendement de la stratégie au siège de VSF/B.

Une mission de monitoring<sup>23</sup> a donc été dépêchée par le siège pour apprécier la proposition du projet. La mission a tenu des rencontres de travail avec les ES qui sont les principaux concernés, pour analyser les problèmes. A l'issue de plusieurs jours de rencontres et d'échanges avec les ES, les partenaires et le projet, la mission a proposé des mesures correctives touchant principalement la mise en place de l'UTPP. Les modifications intervenues par rapport à la stratégie sont notamment :

- La mise en place pendant la deuxième phase du projet de Parcs Polyvalents de Traitement Testage et Commercialisation (PPTTC) en lieu et place de l'UTPP ;
- La garde des veaux et des taurillons chez les ES où ils seront suivis<sup>24</sup> par le projet jusqu'à maturité. Les mesures de performances et les tests devant se faire de façon périodique au niveau du PPTTC ;
- A maturité, les taurillons sont classés par catégorie sur la base de leurs performances et vendus à d'autres EE. La priorité étant réservée aux ES ;
- Le ZEPESA accompagnera les ES à promouvoir la vente des taurillons sélectionnés à travers la mise en relation.

Le PPTTC sera mis en place en collaboration avec un nouveau projet<sup>25</sup> qui a été formulé par le tandem VSF/B et A2N et dont le démarrage est prévu pour l'an 2008. Il s'agit du projet de Commercialisation du Bétail au Sahel (COMBESA). Le COMBESA se servira du PPTTC pour la commercialisation du bétail.

## 2.2.5. Les activités collatérales

---

<sup>21</sup> La mission d'évaluation du PSDZA2 s'est déroulée de Décembre à Janvier 2006.

<sup>22</sup> Il s'agit de l'INERA, du PSDZA2, du projet Azawak Niger.

<sup>23</sup> La mission de monitoring conduite par M. Guy Van Vlaederen s'est déroulée en Septembre 2007.

<sup>24</sup> Le suivi des veaux et des taurillons par le ZEPESA concerne l'alimentation et la santé. Des mesures de performances zootechniques sont également prévues. Ces mesures se feront périodiquement au niveau du PPTTC.

<sup>25</sup> Le nouveau projet, le COMBESA a été formulé par M. Guy Van Vlaederen en Avril 2007.

L'axe amélioration génétique du projet bien qu'étant l'axe principal d'intervention est soutenu par d'autres axes tels que la santé animale et l'alimentation. A travers ces axes connexes, le projet tient à mettre tout en œuvre pour parvenir à son but qui est celui de l'augmentation des productions. S'il est clair que la baisse du potentiel génétique du zébu peul participe à la baisse des productions animales, il ne faut pas non plus perdre de vue l'impact de la dégradation des conditions alimentaires et sanitaires.

Le ZEPESA dans son appui aux EE à promouvoir la race zébu peul travail également à améliorer les conditions sanitaires et alimentaires des animaux. C'est dans ce sens qu'il a appuyé les éleveurs et la Clinique Vétérinaire Kallassal (CVK) à mettre en place un réseau de santé animale de proximité (RSAP<sup>26</sup>). Le RSAP qui a commencé à participer aux campagnes de vaccination dans la province de l'Oudalan depuis l'an 2006 donne déjà un motif de satisfaction avec une augmentation significative du nombre de têtes de bovins vaccinés pendant la campagne 2006-2007. Le RSAP a également intervenu dans un village encadré par le projet pour poser un diagnostic au niveau des animaux sous programme dans le cadre du suivi d'un problème de maladie. Dans le cadre de l'amélioration des conditions alimentaires, le plan d'appui à l'approvisionnement des Banques Aliments Bétail (BAB) a permis d'approvisionnement les ES en SPAI. Des séances de sensibilisation sur le rationnement ont été tenues avec les ES dans le but de leur permettre d'optimiser l'alimentation des animaux encadrés.

Le projet ZEPESA a été associé à la réflexion sur l'élaboration de la stratégie nationale d'amélioration génétique. Une mission de l'Institut de d'Elevage de France<sup>27</sup> (IEF) chargée d'appuyer le MRA dans l'élaboration de la stratégie a été reçue par le projet et les membres du comité locale pour des échanges d'expériences. Le ZEPESA a apporté une contribution pour le financement du processus d'élaboration de la stratégie.

Le comité local appuyé par le ZEPESA a participé à la onzième édition de la journée nationale du paysan tenue à Yakouta dans la commune de Dori. Pour l'occasion, il a exposé deux (02) spécimens du zébu peul dans un stand qui lui a été attribué.

Dans le souci de la poursuite de l'étude sur la caractérisation du zébu peul, le ZEPESA a appuyé le stagiaire qui a conduit l'étude sur la caractérisation des élevages bovins à finaliser un projet de recherche doctorale sur la race zébu peul. Ce projet de recherche a mis à contribution le PSDZA2 et l'université catholique de Louvain en Belgique.

## **2.3. L'analyse du volet**

Le ZEPESA à la fin de l'année a procédé à une auto-évaluation du volet amélioration génétique, cela lui a permis de dégager des forces mais aussi des faiblesses. Les résultats de l'analyse ont été soumis à l'appréciation du comité de suivi. Le tableau ci-après récapitule les résultats de l'analyse du volet amélioration génétique.

---

<sup>26</sup> Le RSAP est dirigé par la CVK avec à sa tête un docteur vétérinaire qui dans son intervention dans les villages s'appuie sur des auxiliaires d'élevage choisis par leur communauté suivant des critères assortis d'un atelier de concertation sur la santé animale tenu les 08 et 09 Juin 2006 le rôle du RSAP est de rapprocher la santé animale des éleveurs.

<sup>27</sup> La mission de l'Institut d'Elevage de France s'est déroulée pendant le mois de Septembre de l'année 2006.



**Tableau n° 1 : Résultats de l'analyse FFOM**

| <b>FORCES</b>                                                                                                  | <b>FAIBLESSES</b>                                                                                                                                                                                                 | <b>OPPORTUNITES</b>                                                                                                                                    | <b>MENACES</b>                                                                                                                 |
|----------------------------------------------------------------------------------------------------------------|-------------------------------------------------------------------------------------------------------------------------------------------------------------------------------------------------------------------|--------------------------------------------------------------------------------------------------------------------------------------------------------|--------------------------------------------------------------------------------------------------------------------------------|
| Le contingent d'ES et d'animaux est suffisamment important.                                                    | Le retard accusé dans la mise en œuvre pratique dû à la révision de la stratégie.                                                                                                                                 | La contribution du ZEPESA à la connaissance des races locales du pays.                                                                                 | Les modes d'élevage de la zone pourraient se présenter comme un facteur limitant à la mise en place d'une action de sélection. |
| La base de sélection du zébu est assez large et variée.                                                        | Les ES, par le fait d'avoir des troupeaux d'élites, ne font pas partie des éleveurs défavorisés alors que le projet ZEPESA est un projet de réduction de la pauvreté, donc orienté vers les éleveurs défavorisés. | Le renforcement des compétences et des ressources humaines disponibles au Burkina Faso sur l'amélioration génétique.                                   | La stratégie nationale d'amélioration génétique n'étant pas encore définie, il y a un risque de durabilité institutionnel.     |
| Les ES se connaissent entre eux, cela forge un esprit fédérateur.                                              |                                                                                                                                                                                                                   | Le sahel qui est la zone d'intervention du projet ZEPESA est le berceau du zébu peul.                                                                  |                                                                                                                                |
| Le renforcement de l'équipe dans ces compétences par l'arrivée de l'assistant du volet amélioration génétique. |                                                                                                                                                                                                                   | La politique du Ministère des Ressources Animales (MRA) à travers la création de la Direction de l'Amélioration Génétique (DAG) est à faveur du projet |                                                                                                                                |
| Le projet dispose d'une bonne capacité de sensibilisation avec des outils adaptés.                             |                                                                                                                                                                                                                   |                                                                                                                                                        |                                                                                                                                |
| Le processus de mise en œuvre de la stratégie est très participatif.                                           |                                                                                                                                                                                                                   |                                                                                                                                                        |                                                                                                                                |
| La mise en place d'un cadre d'échanges entre savoir traditionnelle et savoir scientifique.                     |                                                                                                                                                                                                                   |                                                                                                                                                        |                                                                                                                                |

## 2.4. Les activités en perspective

Le programme d'amélioration génétique n'est qu'à une étape de sa mise en œuvre, la sélection des animaux a permis de constituer les troupeaux d'élites. Il reste encore à réaliser d'autres

activités dans le cadre de la mise en œuvre intégrale du programme de sélection. Les activités en perspective au niveau du ZEPESA qui ont été présentées au comité de suivi sont les suivantes :

- 1 Appui à l'acquisition de taureaux reproducteurs par les ES non pourvus ;
- 2 Bouclage des animaux sous programme ;
- 3 Mise en place d'un dispositif de suivi des performances des animaux (suivi zootechnique et généalogique) ;
- 4 Organisation de foires, voyages d'échanges pour la promotion du zébu peul ;
- 5 Appui à la fédération des ES et au renforcement du CL ;
- 6 Elargissement de la zone d'intervention aux deux autres départements de la province (Gorom-Gorom et Déou) ;
- 7 Recrutement de nouveaux contingents d'ES.
- 8 Appui à l'alimentation et au suivi sanitaire des animaux.

### **3. SYNTHESE DES DEBATS**

Beaucoup d'échanges se sont fait, donnant lieu à des débats très enrichissants. Les préoccupations du dernier atelier relatives aux montes raisonnées et au système d'identification des animaux ont de nouveaux été posées dans les débats. Invités à décrire leur démarche dans la réalisation des montes raisonnées, les ES ont rassuré les participants sur la bonne conduite des animaux encadrés qui est la seule garantie pour aboutir à de véritables montes raisonnées. Ils ont en effet, par rapport à leur engagement, chacun confié la garde du troupeau encadré à un berger qui est chargé de surveiller et contrôler les saillies. Le fait que les troupeaux encadrés partagent les mêmes pâturages et les mêmes points d'eau avec d'autres animaux pourrait en effet être une limite objective au programme de sélection, si aucune mesure n'était prise pour suivre et contrôler les saillies. Les participants tout en appréciant la méthode pratiquée par les ES, les ont invité à beaucoup plus de vigilance, ils ont par ailleurs exhorté les ES et le projet à impliquer d'avantage les bergers dans les actions de sensibilisation sur la conduite du troupeau. Quant au système d'identification, les questions évoquées ont été suscitées suite à l'intention manifestée par le projet de procéder au bouclage des animaux déjà sélectionnés. Le directeur de l'amélioration génétique préoccupé par l'harmonisation du système d'identification des animaux dans tout le pays a souhaité que le ZEPESA puisse attendre la finalisation du système national d'identification des animaux pour se conformer aux dispositions nationales. Le ZEPESA ayant déjà été imprégné de ce processus après plusieurs rencontres d'échanges sur la méthodologie, estime être dans la même nomenclature par rapport à la codification, du reste, il a pris l'engagement de se conformer plus tard au système national.

Les modifications intervenues par rapport à la démarche initiale concernant le programme de sélection ont été les points qui ont suscités beaucoup plus d'interrogations et de débats. Certains participants ont eu des appréhensions par rapport à la suppression de l'unité de testage et son remplacement par le PPTTC. Cette modification entraîne des changements par rapport au dispositif initial de suivi des performances. Avec l'unité de testage, il était prévu l'achat des taurillons par le ZEPESA et leur transfert dans l'unité de testage pour le suivi des performances. Maintenant avec les modifications, le grand changement est que les taurillons resteront chez l'ES où ils seront suivis par le projet. Les préoccupations des participants sont nombreuses, ils

s'interrogent sur la précision des mesures en milieu paysan avec toutes ses contraintes. Partageant les préoccupations posées, le projet a rassuré les participants en précisant que les mesures de performances sont plutôt prévues au niveau du PPTTC à des périodicités bien déterminées et que seuls les suivis zootechniques élémentaires et zoo sanitaires seront réalisés chez l'ES. De l'avis du Directeur du PSDZA2, l'unité de testage, dans sa forme initiale reste important pour accorder du crédit à ceux qui envisagent produire des animaux performants, ils pensent, en outre que l'unité de testage garantirait la pérennité des activités après le projet. Pour d'autres participants, la suppression de l'unité de testage serait tout simplement un frein au programme de sélection à cause du mode d'élevage pratiqué par les éleveurs. Cela les a amenés à s'intéresser aux détails sur le dispositif de suivi mis en place par le projet. Le dispositif de suivi envisagé par le projet prévoit les mesures des paramètres de performances zootechniques (vitesse de croissance, aptitudes de reproduction, ...) sur les taurillons au niveau du PPTTC, un suivi alimentaire, sanitaire et des productions laitières sur les laitières chez les ES. Le dispositif placé sous la supervision du chargé du volet et de son assistant implique les animateurs et les ES dans la collecte des données.

Des échanges ont eu lieu autour de la difficulté qui a été rencontrée par les ES concernant l'acquisition de bon taureau. L'initiative du projet dans l'appui des ES à acquérir les taureaux a été bien appréciée. Mais les participants n'ont pas manqué de fustiger l'esprit toujours attentiste des éleveurs car disent-ils vu le nombre de têtes que possède chaque ES, l'acquisition de nouveau taureau ne devraient pas constituer une difficulté. Aussi il a été évoqué la question de l'élimination des taureaux après quatre années d'exploitation, comme prévu dans la démarche. Le représentant du CMAP a voulu savoir comment les ES ont accueilli cette information. Naturellement, face aux ES bien sensibilisés et qui ont pris conscience des dangers de la consanguinité, l'élimination des taureaux performants ne souffre plus de débat. La préoccupation des ES se posait plutôt sur l'écoulement de ces taureaux qui quitteraient le programme. Le COMBESA vient en réponse à cette préoccupation à travers la facilitation de la vente des taureaux performants à d'autres ES ou EE.

Dans l'ensemble les échanges étaient fructueux entre les ES, le CL et les scientifiques. Les ES souvent interpellés par des questions de pratiques se sont montrés bien impliqués et suffisamment imprégnés dans les activités. Cependant, ils ont été appelés par le directeur de l'amélioration génétique à s'impliquer d'avantage, puisque dit-il, les éleveurs sont les principaux concernés par l'amélioration génétique. A ce propos, il les a invités à mettre en œuvre les recommandations qui ont été faites au cours des débats et qui visent à optimiser les chances de réussite, recommandations qui ont été d'ailleurs prises par l'atelier au terme des travaux.

## **4. RECOMMANDATIONS**

Les recommandations qui ont été prises par le deuxième atelier du comité de suivi s'adressent au projet ZEPESA mais aussi aux ES. Elles ont été faites dans le souci d'améliorer les conditions d'élevage et de pérenniser les actions. Elles s'intéressent essentiellement à l'alimentation et à l'implication plus large des familles des ES aux activités. Les principales recommandations sont les suivantes.

➤ **A l'endroit du projet ZEPESA :**

- 1 Veiller à se conformer au système d'identification national ;
- 2 Poursuivre le projet de recherche sur la caractérisation du zébu peul ;
- 3 Mettre l'accent sur la production et la conservation du fourrage afin de minimiser les coûts de SPAI ;
- 4 Appuyer les EE à se doter de moyens pour faire face aux activités de fauche et conservation du fourrage ;
- 5 Prendre des dispositions pour impliquer les familles des ES dans les activités en vue de leur pérennisation ;
- 6 Sensibiliser les bergers des animaux encadrés sur la conduite du troupeau ;
- 7 Appuyer les ES à se mettre en groupement ;
- 8 Poursuivre la collaboration avec les partenaires en impliquant d'avantage la DPRA dans les activités.

➤ **A l'endroit des ES :**

- 1 Impliquer les autres membres de la famille aux activités ;
- 2 Informer les bergers des dispositions en vigueur pour la réalisation des montes raisonnées;
- 3 Faire des stocks de foin ;
- 4 S'organiser en groupement d'ES.

# CONCLUSION

L'atelier du comité de suivi s'est terminé sur des notes de satisfaction, avec cependant quelques préoccupations qui ont amené les participants à faire des recommandations. Le rythme d'exécution des activités est relativement faible mais, il reflète le contexte de mise en œuvre du projet qui est celui du milieu paysan. Les ES sont suffisamment impliqués dans la démarche, la machine est en marche, il reste à attendre les résultats dans les années à venir.

Néanmoins nous devons garder à l'esprit que l'amélioration génétique bovine est un travail de longue haleine qui requiert une vision pluriannuelle. Cela dit, l'amélioration génétique doit venir en complément d'un travail de fond sur les conditions d'élevage, notamment sur la santé animale et l'alimentation, qui peut aboutir à des résultats probants en moins de temps.

En général, l'amélioration génétique vise des objectifs de production<sup>28</sup> qui, le plus souvent, sont beaucoup plus variés dans les communautés traditionnelles que dans les systèmes de production intensifs et intègrent des aspects autres que le rendement élevé des produits commerciaux tels que la viande et le lait.

Les éleveurs disposent de connaissances ancestrales en matière de sélection du bétail qui les amène à choisir un animal en fonction de sa généalogie pour faire face à leurs multiples objectifs de productions. En effet, il est courant de rencontrer des éleveurs qui gardent en mémoire tous les détails caractérisant l'ascendance de leurs animaux, et cela parfois jusqu'à plusieurs générations.

Ces connaissances intrinsèques sont à la base de certains comportements des éleveurs sahéliens en matière de sélection et gestion des troupeaux, tels que l'échange d'animaux, la castration, le contrôle des performances des descendants<sup>29</sup>. En effet, compte tenu de leur forte dépendance vis-à-vis des animaux, ces communautés pastorales se sont particulièrement employées à développer des pratiques de sélection et d'élevage contribuant à protéger et à accroître leur base de ressources. Les communautés pastorales gardent leurs animaux dans des conditions proches de celles rencontrées dans la nature ; c'est pourquoi les races qu'elles élèvent sont d'avantage susceptibles de conserver les caractères revêtant le plus grand intérêt du point de vue de la « ressource génétique ».

La conviction selon laquelle les races exotiques importées sont supérieures aux races locales est encore très souvent ancrée dans l'esprit de certains décideurs politiques, des techniciens et autres organisations de coopération. Malheureusement beaucoup d'entre eux demeurent encore peu conscients du problème de l'érosion des ressources génétiques animales ainsi que de la valeur et des avantages comparatifs des races traditionnelles.

Il faudrait soutenir des travaux de recherche sur le rôle des connaissances traditionnelles dans la

---

<sup>28</sup> Les objectifs de production vers lesquels les EE sont orientés au niveau du projet ZEPESA sont connus de tous, il s'agit de la production de lait et de viande.

<sup>29</sup> Certains éleveurs commencent par accoupler leurs meilleurs taureaux avec un nombre restreint de femelles. Ce n'est que lorsque les premiers-nés de la descendance auront les qualités souhaitées que le géniteur sera utilisé plus largement pour la reproduction.

sélection génétique conservatrice et amélioratrice. En même temps il serait souhaitable de promouvoir, dès le niveau central du Ministère, le développement de techniques d'enregistrement et de matériel de formation/vulgarisation à l'intention des éleveurs, dont la plupart est analphabète. Car la connaissance des performances et de la généalogie d'un animal est une condition incontournable sur la voie du progrès génétique.

Dans la mise en œuvre de sa politique, l'Etat devrait promouvoir l'appui à l'évaluation des avantages économiques des races locales dans les contextes des systèmes ruraux de subsistance. Dans la négociation des futurs programmes d'appui au développement de l'élevage, l'Etat devrait veiller à ce que les agences et les organisations de coopération n'adoptent pas systématiquement le métissage, au profit du développement de races locales dans le contexte des contraintes écologiques.

Le projet ZEPESA est satisfait de la contribution des participants à ce deuxième atelier du comité de suivi, il s'engage à appliquer de façon efficace et diligente toutes les recommandations prises lors de l'atelier. Il accompagnera, en particulier, les ES dans la prise en compte des recommandations qui ont été formulées à leur endroit. Il rassure dore-et-déjà les participants de la poursuite et le renforcement de la collaboration avec tous les partenaires. Il rappelle enfin au comité de suivi que le prochain atelier est prévu pour se tenir en Juin 2008.

# ANNEXES

**Annexe 1 : TdR de l’atelier**

**Annexe 2 : Programme de l’atelier**

**Annexe 3 : Liste des participants**

**Annexe 4 : Fiche signalétique ZEPESA**

**Annexe 5 : Stratégie opérationnelle d’amélioration durable du potentiel génétique du zébu peul**

**Annexe 6 : Rappel des critères de sélection du zébu peul**
